# Supplementary material for: A dominant homolytic O–Cl bond cleavage with low-spin triplet-state Fe(iv)O formed is revealed in the mechanism of heme-dependent chlorite dismutase
Source: Royal Society of Chemistry journal article supplement (doi:10.1039/c3dt52171k), 2013-10-02
Supplement: c3dt52171k.pdf [file c3dt52171k.pdf]

Supplementary Information to:

**A dominant homolytic O-Cl bond cleavage with  
low-spin triplet-state Fe(IV)=O formed is revealed in  
the mechanism of heme-dependent chlorite dismutase**

Shuo Sun, Ze-Sheng Li, and Shi-Lu Chen\*

Key Laboratory of Cluster Science of Ministry of Education, School of Chemistry,  
Beijing Institute of Technology, Beijing 100081, China

Fax: +86 01 6891 1354; Tel: +86 01 6891 8670; E-mail: shlchen@bit.edu.cn

**Contents:**

1. Supplementary tables and figures
2. The complete reference 38
3. Cartesian coordinates and absolute energies of all optimized structures

## 1. Supplementary tables and figures

**Table S1** Solvation effects of stationary points

| Entry | Stationary points       | Solvation effects (kcal/mol) |
|-------|-------------------------|------------------------------|
| 1     | React <sub>II</sub>     | 0.00                         |
| 2     | TS1 <sub>II,21</sub>    | -0.05                        |
| 3     | Int1 <sub>II,21</sub>   | 0.04                         |
| 4     | Int1b <sub>II,21</sub>  | 0.01                         |
| 5     | TS2 <sub>II,21</sub>    | -0.36                        |
| 6     | Int2 <sub>II,21</sub>   | 0.01                         |
| 7     | Int2b <sub>II,21</sub>  | 0.01                         |
| 8     | Prod <sub>II,21</sub>   | 0.10                         |
| 9     | Prod <sub>IV,21</sub>   | 0.06                         |
| 10    | TS <sub>II,hetero</sub> | -0.52                        |
| 11    | Int1 <sub>II,01</sub>   | 0.05                         |
| 12    | Int1 <sub>IV,21</sub>   | 0.04                         |
| 13    | React <sub>IV</sub>     | -0.01                        |
| 14    | TS1 <sub>IV,41</sub>    | -0.12                        |
| 16    | Int1 <sub>IV,41</sub>   | 0.00                         |
| 16    | React <sub>VI</sub>     | 0.01                         |
| 17    | TS1 <sub>VI,41</sub>    | -0.10                        |
| 18    | Int1 <sub>VI,41</sub>   | 0.01                         |

**Table S2** Dispersion effects of stationary points

| Entry | Stationary points       | Dispersion effects (kcal/mol) |
|-------|-------------------------|-------------------------------|
| 1     | React <sub>II</sub>     | 0.0                           |
| 2     | TS1 <sub>II,21</sub>    | 2.7                           |
| 3     | Int1 <sub>II,21</sub>   | 0.5                           |
| 4     | Int1b <sub>II,21</sub>  | 0.9                           |
| 5     | TS2 <sub>II,21</sub>    | 0.5                           |
| 6     | Int2 <sub>II,21</sub>   | 1.0                           |
| 7     | Int2b <sub>II,21</sub>  | 3.6                           |
| 8     | Prod <sub>II,21</sub>   | 5.8                           |
| 9     | Prod <sub>IV,21</sub>   | 4.5                           |
| 10    | TS <sub>II,hetero</sub> | 2.7                           |
| 11    | Int1 <sub>II,01</sub>   | 0.8                           |
| 12    | Int1 <sub>IV,21</sub>   | 1.6                           |
| 13    | React <sub>IV</sub>     | 3.8                           |
| 14    | TS1 <sub>IV,41</sub>    | 3.2                           |
| 15    | Int1 <sub>IV,41</sub>   | 2.6                           |
| 16    | React <sub>VI</sub>     | 2.1                           |
| 17    | TS1 <sub>VI,41</sub>    | 7.9                           |
| 18    | Int1 <sub>VI,41</sub>   | 2.0                           |

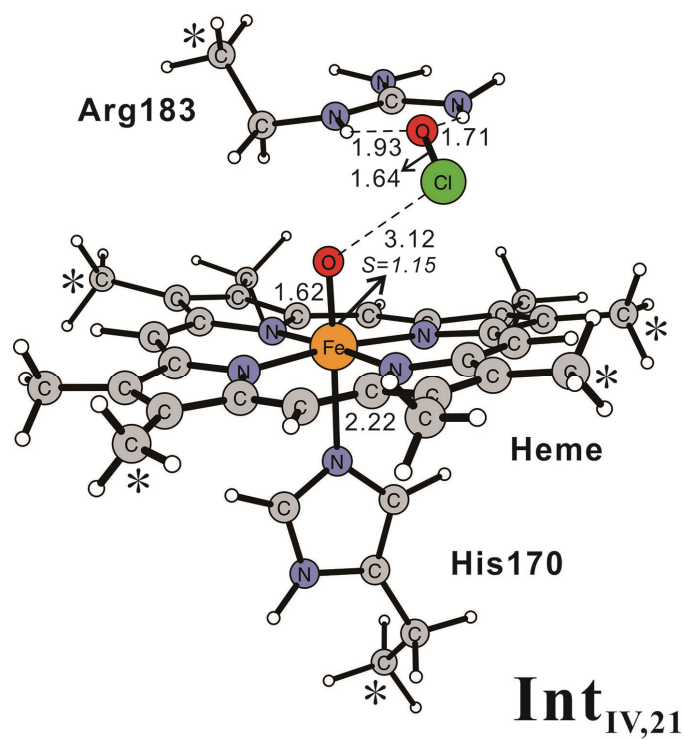

**Fig. S1** Optimized structure of a quartet-state intermediate formed by ferromagnetical coupling between the low-spin triplet-state Fe(IV)=O diradicaloid and Cl-O<sup>•</sup> radical.

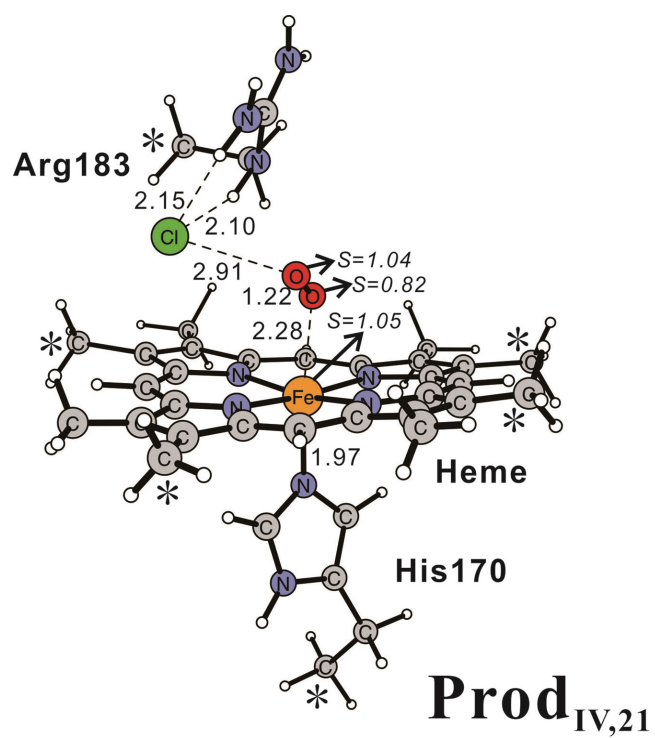

**Fig. S2** Optimized structure of the quartet-state product formed by ferromagnetical coupling between low-spin Fe(III)(heme) cofactor and the triplet-state O<sub>2</sub>.

## ***2. The complete reference 38***

M. J. Frisch, G. W. Trucks, H. B. Schlegel, G. E. Scuseria, M. A. Robb, J. R. Cheeseman, J. A. Montgomery, Jr., T. Vreven, K. N. Kudin, J. C. Burant, J. M. Millam, S. S. Iyengar, J. Tomasi, V. Barone, B. Mennucci, M. Cossi, G. Scalmani, N. Rega, G. A. Petersson, H. Nakatsuji, M. Hada, M. Ehara, K. Toyota, R. Fukuda, J. Hasegawa, M. Ishida, T. Nakajima, Y. Honda, O. Kitao, H. Nakai, M. Klene, X. Li, J. E. Knox, H. P. Hratchian, J. B. Cross, V. Bakken, C. Adamo, J. Jaramillo, R. Gomperts, R. E. Stratmann, O. Yazyev, A. J. Austin, R. Cammi, C. Pomelli, J. W. Ochterski, P. Y. Ayala, K. Morokuma, G. A. Voth, P. Salvador, J. J. Dannenberg, V. G. Zakrzewski, S. Dapprich, A. D. Daniels, M. C. Strain, O. Farkas, D. K. Malick, A. D. Rabuck, K. Raghavachari, J. B. Foresman, J. V. Ortiz, Q. Cui, A. G. Baboul, S. Clifford, J. Cioslowski, B. B. Stefanov, G. Liu, A. Liashenko, P. Piskorz, I. Komaromi, R. L. Martin, D. J. Fox, T. Keith, M. A. Al-Laham, C. Y. Peng, A. Nanayakkara, M. Challacombe, P. M. W. Gill, B. Johnson, W. Chen, M. W. Wong, C. Gonzalez and J. A. Pople, Gaussian 03, Revision E.01, Gaussian, Inc., Wallingford CT, 2004.

### 3. Cartesian coordinates and absolute energies of all optimized structures

The abbreviations used here are consistent with those in the text. All energies here are the absolute energies in hartree. Frequencies are given in  $\text{cm}^{-1}$ .

#### React<sub>II</sub>

|                                           |              |
|-------------------------------------------|--------------|
| Energy with the small basis set:          | -2626.254279 |
| Solution energy with the small basis set: | -2626.254306 |
| Energy with larger basis sets:            | -2626.936511 |
| Zero-point energy:                        | 0.779232     |
| Dispersion effect:                        | -0.180650103 |

|    |             |             |             |
|----|-------------|-------------|-------------|
| C  | 83.56100000 | 29.40899998 | 40.48999996 |
| C  | 84.40751854 | 28.46158684 | 39.61534736 |
| C  | 84.19983017 | 28.62718335 | 38.13877413 |
| N  | 84.33770254 | 29.84645751 | 37.48894723 |
| C  | 83.87862731 | 27.74169465 | 37.14163144 |
| C  | 84.10281726 | 29.67080229 | 36.16976652 |
| N  | 83.82240382 | 28.40048618 | 35.92632362 |
| C  | 78.74700005 | 28.42299994 | 29.79600007 |
| C  | 78.66103662 | 28.09248885 | 31.28455635 |
| N  | 79.02766790 | 26.70559462 | 31.58147560 |
| C  | 78.22773045 | 25.74486905 | 32.01812775 |
| N  | 76.88132334 | 25.86403430 | 31.98037608 |
| N  | 78.76692324 | 24.63612607 | 32.55928285 |
| Fe | 83.34866733 | 27.67997716 | 34.07515496 |
| C  | 83.70213489 | 24.37699413 | 35.01590696 |
| C  | 80.14559042 | 27.65309174 | 35.19184778 |
| C  | 82.86539913 | 30.83990689 | 32.78028586 |
| C  | 86.65034420 | 27.84650057 | 33.31356944 |
| N  | 82.16538424 | 26.28334224 | 34.93127630 |
| C  | 82.47096805 | 24.97808643 | 35.24891357 |
| C  | 81.33476916 | 24.33102428 | 35.88765152 |
| C  | 80.34777601 | 25.27951727 | 35.96683795 |
| C  | 80.87706896 | 26.48581084 | 35.35738284 |
| C  | 78.96877007 | 25.15163865 | 36.54147163 |
| C  | 81.28899999 | 22.90700010 | 36.36999995 |
| N  | 81.80574274 | 29.00619287 | 33.99215065 |
| C  | 80.56053567 | 28.79637770 | 34.51758720 |
| C  | 79.68326156 | 29.90950810 | 34.20546928 |
| C  | 80.40985223 | 30.79234951 | 33.44382003 |
| C  | 81.75561138 | 30.22350724 | 33.34895832 |

|   |             |             |             |
|---|-------------|-------------|-------------|
| C | 78.25437265 | 30.01839190 | 34.65043981 |
| C | 79.89800002 | 32.07999996 | 32.83400002 |
| N | 84.55639799 | 29.10663667 | 33.25151097 |
| C | 84.17216140 | 30.34135812 | 32.78459878 |
| C | 85.33399873 | 31.08225573 | 32.33360520 |
| C | 86.43866681 | 30.28757792 | 32.53231676 |
| C | 85.92281275 | 29.02028286 | 33.07693208 |
| C | 85.34618979 | 32.47117777 | 31.76467915 |
| C | 87.85999997 | 30.75899998 | 32.22300002 |
| N | 84.86427340 | 26.35036573 | 34.13622995 |
| C | 86.15811108 | 26.60778583 | 33.74664351 |
| C | 86.94983353 | 25.37892962 | 33.84065127 |
| C | 86.11192709 | 24.38049172 | 34.28755391 |
| C | 84.81991482 | 25.01882572 | 34.49053742 |
| C | 88.40105727 | 25.27888862 | 33.47587111 |
| C | 86.39099997 | 22.89700004 | 34.52599998 |
| H | 85.47105297 | 28.60146991 | 39.85418373 |
| H | 84.17666174 | 27.42145425 | 39.86670049 |
| H | 83.68663876 | 26.68352275 | 37.21247017 |
| H | 84.13620772 | 30.45963249 | 35.43606835 |
| H | 83.80032682 | 30.46186783 | 40.30234909 |
| H | 78.49887072 | 29.47631736 | 29.63413535 |
| H | 78.05823581 | 27.81340746 | 29.20165706 |
| H | 77.65726490 | 28.28361129 | 31.67709215 |
| H | 79.34095264 | 28.73231880 | 31.85381344 |
| H | 80.02253152 | 26.42239287 | 31.51595939 |
| H | 76.29674478 | 25.18585771 | 32.44135697 |
| H | 76.43715979 | 26.54272957 | 31.38464628 |
| H | 79.79489076 | 24.59202386 | 32.58041409 |
| H | 78.25642421 | 23.76729762 | 32.50651309 |
| H | 83.80810547 | 23.33289736 | 35.28702155 |
| H | 79.13441922 | 27.65443442 | 35.58195082 |
| H | 82.70954755 | 31.81603566 | 32.33509212 |
| H | 87.71206727 | 27.88661444 | 33.09300074 |
| H | 78.81028109 | 24.16917945 | 36.99246882 |
| H | 78.78444888 | 25.90126427 | 37.31942893 |
| H | 78.20006684 | 25.28763121 | 35.77084982 |
| H | 80.30938964 | 22.65859495 | 36.78444781 |
| H | 82.03317950 | 22.72281872 | 37.15376153 |
| H | 77.69218153 | 29.09819076 | 34.45277846 |
| H | 78.18156825 | 30.20935659 | 35.72834042 |
| H | 77.73645058 | 30.83662277 | 34.14416693 |
| H | 80.19837539 | 32.95861363 | 33.41838283 |
| H | 84.35337751 | 32.92523455 | 31.73204710 |



|    |             |             |             |
|----|-------------|-------------|-------------|
| H  | 85.99067916 | 33.13691127 | 32.35191898 |
| H  | 85.73955248 | 32.47395311 | 30.74100976 |
| H  | 88.11833851 | 31.62514251 | 32.84254001 |
| H  | 88.79334551 | 24.27864273 | 33.67439779 |
| H  | 89.01158795 | 25.98963394 | 34.04545511 |
| H  | 88.56417453 | 25.49150762 | 32.41269598 |
| H  | 85.76489690 | 22.26993217 | 33.88161941 |
| H  | 87.43480103 | 22.65518851 | 34.31431745 |
| Cl | 82.79439819 | 25.64016231 | 31.83101276 |
| O  | 82.90166585 | 27.22154636 | 32.28737531 |
| O  | 81.27376906 | 25.17097687 | 31.67588552 |
| H  | 83.75207985 | 29.21746592 | 41.54953492 |
| H  | 82.49213184 | 29.26878097 | 40.30347126 |
| H  | 81.49523523 | 22.19681139 | 35.56000930 |
| H  | 80.28202707 | 32.22143912 | 31.81854771 |
| H  | 78.80706952 | 32.08030820 | 32.78141396 |
| H  | 88.60671892 | 29.98239966 | 32.40797740 |
| H  | 87.94591129 | 31.06493843 | 31.17471281 |
| H  | 86.18679347 | 22.61462545 | 35.56487129 |
| H  | 84.57573194 | 30.72571716 | 37.92408125 |
| H  | 79.75959663 | 28.25334303 | 29.41823706 |

### TS1<sub>II,21</sub>

|                                           |                       |
|-------------------------------------------|-----------------------|
| Energy with the small basis set:          | -2626.244273          |
| Solution energy with the small basis set: | -2626.244376          |
| Energy with larger basis sets:            | -2626.922041          |
| Zero-point energy:                        | 0.777279              |
| Dispersion effect:                        | -0.176278391          |
| Imaginary frequency:                      | -311 cm <sup>-1</sup> |

|   |             |             |             |
|---|-------------|-------------|-------------|
| C | 4.81579500  | 4.35547800  | -2.51176900 |
| C | 4.82711500  | 3.38995000  | -1.31078100 |
| C | 3.74542900  | 2.35199400  | -1.33631000 |
| N | 3.53578800  | 1.50714200  | -2.41626200 |
| C | 2.80030400  | 1.97277000  | -0.41580200 |
| C | 2.50780300  | 0.67484600  | -2.12601900 |
| N | 2.04035000  | 0.93111100  | -0.91640400 |
| C | -5.74251700 | -0.67116400 | -1.18385800 |
| C | -4.62416100 | -0.13195200 | -0.28411100 |
| N | -4.28762000 | -1.02059200 | 0.83119600  |
| C | -4.90366200 | -1.06211100 | 2.01058200  |
| N | -6.04504100 | -0.36990300 | 2.22538100  |
| N | -4.37592800 | -1.79441900 | 2.99809300  |

|    |             |             |             |
|----|-------------|-------------|-------------|
| Fe | 0.38826300  | -0.06977800 | -0.02691400 |
| C  | 1.01482100  | 1.18956800  | 3.09169900  |
| C  | -1.32304900 | 2.78646500  | -0.82832700 |
| C  | -0.50760900 | -1.42632300 | -3.03380800 |
| C  | 2.55078300  | -2.65448900 | 0.53915600  |
| N  | -0.01138800 | 1.67577500  | 0.92592100  |
| C  | 0.29617000  | 2.00432000  | 2.22307700  |
| C  | -0.20766800 | 3.33619600  | 2.54415400  |
| C  | -0.82639200 | 3.79306100  | 1.40979500  |
| C  | -0.71737300 | 2.73662000  | 0.41928100  |
| C  | -1.50730700 | 5.10819600  | 1.17469600  |
| C  | -0.05427300 | 4.05179800  | 3.86024900  |
| N  | -0.71650600 | 0.55836500  | -1.64238000 |
| C  | -1.36766500 | 1.75347000  | -1.75623100 |
| C  | -2.16233300 | 1.78500600  | -2.97286000 |
| C  | -1.99802600 | 0.57140500  | -3.59054300 |
| C  | -1.06164300 | -0.18295300 | -2.74671200 |
| C  | -2.98060900 | 2.96335500  | -3.41162000 |
| C  | -2.64437500 | 0.12661300  | -4.88425800 |
| N  | 0.96963000  | -1.71404900 | -1.06492400 |
| C  | 0.46172600  | -2.09940200 | -2.28195500 |
| C  | 1.12464000  | -3.30898800 | -2.73119200 |
| C  | 2.05311600  | -3.65939600 | -1.78012100 |
| C  | 1.91325600  | -2.65813000 | -0.70693500 |
| C  | 0.82275200  | -4.01648300 | -4.01934700 |
| C  | 2.99274000  | -4.86194900 | -1.90953300 |
| N  | 1.51700600  | -0.64193800 | 1.52933800  |
| C  | 2.33331500  | -1.75171500 | 1.58874700  |
| C  | 2.91468800  | -1.85854900 | 2.92619900  |
| C  | 2.44073200  | -0.80096200 | 3.67228300  |
| C  | 1.59422100  | -0.03286900 | 2.76776500  |
| C  | 3.84510300  | -2.95509800 | 3.35199900  |
| C  | 2.70341200  | -0.44216900 | 5.13707200  |
| H  | 5.80749600  | 2.89724800  | -1.25288700 |
| H  | 4.71941800  | 3.95633000  | -0.38053200 |
| H  | 2.61725600  | 2.37682100  | 0.56682200  |
| H  | 2.13318500  | -0.07786300 | -2.80044100 |
| H  | 4.97130200  | 3.82993900  | -3.46063700 |
| H  | -5.92941200 | 0.02849400  | -2.00375100 |
| H  | -6.68153900 | -0.81304400 | -0.63883300 |
| H  | -4.87923200 | 0.85771600  | 0.11525100  |
| H  | -3.70263000 | 0.00010900  | -0.85472300 |
| H  | -3.46149400 | -1.61871300 | 0.75294300  |
| H  | -6.36758600 | -0.21697100 | 3.16731400  |

|    |             |             |             |
|----|-------------|-------------|-------------|
| H  | -6.43535400 | 0.21368300  | 1.50459500  |
| H  | -3.53859000 | -2.36370600 | 2.74835300  |
| H  | -4.94616500 | -2.05089000 | 3.78887300  |
| H  | 1.17800700  | 1.56068400  | 4.09745800  |
| H  | -1.86426800 | 3.69266100  | -1.07442000 |
| H  | -0.81956500 | -1.90189700 | -3.95746200 |
| H  | 3.24820100  | -3.46250900 | 0.73368400  |
| H  | -1.47399700 | 5.74157000  | 2.06354800  |
| H  | -1.03485500 | 5.66635800  | 0.35797100  |
| H  | -2.56248300 | 4.97738300  | 0.90672500  |
| H  | -0.53752400 | 5.03020600  | 3.83681400  |
| H  | 1.00046200  | 4.21080700  | 4.11375900  |
| H  | -3.72153200 | 3.25008600  | -2.65597700 |
| H  | -2.35121500 | 3.84299100  | -3.59128400 |
| H  | -3.52054900 | 2.75843200  | -4.33823400 |
| H  | -1.90692600 | 0.01253400  | -5.68801700 |
| H  | 0.91363500  | -3.34929200 | -4.88423700 |
| H  | 1.50090400  | -4.85693700 | -4.18015800 |
| H  | -0.19814600 | -4.41710200 | -4.02713800 |
| H  | 3.44591000  | -4.88456100 | -2.90414700 |
| H  | 4.15942900  | -2.82913500 | 4.39026100  |
| H  | 4.75157000  | -2.97554900 | 2.73571200  |
| H  | 3.37438800  | -3.94154400 | 3.26797100  |
| H  | 1.76703900  | -0.39212800 | 5.70257700  |
| H  | 3.34362600  | -1.18736900 | 5.61291500  |
| Cl | -0.90992100 | -2.39599200 | 1.85386100  |
| O  | -1.03277600 | -0.76316300 | 0.51207200  |
| O  | -2.37825800 | -3.04311400 | 1.69623400  |
| H  | 5.61919800  | 5.09061800  | -2.41446400 |
| H  | 3.86528400  | 4.89290900  | -2.57795700 |
| H  | -0.50024900 | 3.48222000  | 4.68407500  |
| H  | -3.14801700 | -0.84024700 | -4.77278800 |
| H  | -3.38684100 | 0.85206300  | -5.22067600 |
| H  | 3.80405200  | -4.82639200 | -1.17731000 |
| H  | 2.45385900  | -5.80399700 | -1.76165300 |
| H  | 3.19931200  | 0.53064900  | 5.22474400  |
| H  | 4.05716100  | 1.51044600  | -3.28029800 |
| H  | -5.46002900 | -1.63566700 | -1.61434800 |

## Int1<sub>II,21</sub>

|                                           |              |
|-------------------------------------------|--------------|
| Energy with the small basis set:          | -2626.247408 |
| Solution energy with the small basis set: | -2626.247379 |
| Energy with larger basis sets:            | -2626.924478 |
| Zero-point energy:                        | 0.775504     |
| Dispersion effect:                        | -0.179863567 |

|    |             |             |             |
|----|-------------|-------------|-------------|
| C  | 83.56100000 | 29.40899997 | 40.48999992 |
| C  | 84.49102135 | 28.49612930 | 39.66757143 |
| C  | 84.33708243 | 28.65947320 | 38.18663010 |
| N  | 84.59158655 | 29.85281426 | 37.52829439 |
| C  | 83.93119871 | 27.80261069 | 37.19470555 |
| C  | 84.33918308 | 29.67991795 | 36.20710907 |
| N  | 83.93600578 | 28.44464226 | 35.97128537 |
| C  | 78.74700005 | 28.42299994 | 29.79600011 |
| C  | 79.60299944 | 28.15029974 | 31.04362535 |
| N  | 79.73719540 | 26.73226160 | 31.41098133 |
| C  | 78.81859295 | 26.03880466 | 32.07573393 |
| N  | 77.58408371 | 26.55663328 | 32.28518868 |
| N  | 79.10931483 | 24.83250165 | 32.58022500 |
| Fe | 83.32276022 | 27.67533414 | 33.99419880 |
| C  | 83.67475296 | 24.39201842 | 34.95360038 |
| C  | 80.17312316 | 27.70804895 | 35.30544550 |
| C  | 82.85473968 | 30.83409455 | 32.78237422 |
| C  | 86.64669044 | 27.84727999 | 33.28190352 |
| N  | 82.16880112 | 26.32332954 | 34.98196851 |
| C  | 82.46299339 | 25.00123254 | 35.23962135 |
| C  | 81.33823258 | 24.34749186 | 35.91585959 |
| C  | 80.37893066 | 25.31207120 | 36.06147780 |
| C  | 80.90713600 | 26.53028767 | 35.45050679 |
| C  | 79.02612753 | 25.20461171 | 36.69754647 |
| C  | 81.28899999 | 22.90700017 | 36.36999990 |
| N  | 81.80733995 | 29.03472092 | 34.04996822 |
| C  | 80.57280883 | 28.83617496 | 34.60242947 |
| C  | 79.68833579 | 29.95570605 | 34.28457350 |
| C  | 80.40188120 | 30.81416320 | 33.49186437 |
| C  | 81.75165947 | 30.23115166 | 33.38471659 |
| C  | 78.26654896 | 30.06217309 | 34.75274397 |
| C  | 79.89800005 | 32.07999990 | 32.83400003 |
| N  | 84.55162783 | 29.10247505 | 33.23418230 |
| C  | 84.16152246 | 30.33388287 | 32.77886566 |
| C  | 85.32768993 | 31.08994233 | 32.33360459 |
| C  | 86.43226038 | 30.30093589 | 32.52318900 |

|   |             |             |             |
|---|-------------|-------------|-------------|
| C | 85.91497514 | 29.01800719 | 33.05388972 |
| C | 85.30812995 | 32.48208552 | 31.77709228 |
| C | 87.85999995 | 30.75899997 | 32.22300003 |
| N | 84.85843810 | 26.35830318 | 34.08732014 |
| C | 86.14710952 | 26.60578221 | 33.70505184 |
| C | 86.94214663 | 25.36664703 | 33.80117715 |
| C | 86.10090953 | 24.37342134 | 34.23585638 |
| C | 84.79714459 | 25.02695622 | 34.41882319 |
| C | 88.39899277 | 25.27851182 | 33.45961891 |
| C | 86.39099997 | 22.89700005 | 34.52599999 |
| H | 85.53488757 | 28.67988446 | 39.95730446 |
| H | 84.28981967 | 27.44771556 | 39.91024581 |
| H | 83.63688134 | 26.76876888 | 37.28127638 |
| H | 84.45692441 | 30.45689520 | 35.46874116 |
| H | 83.76005418 | 30.46955351 | 40.29949319 |
| H | 78.75554145 | 29.49572587 | 29.58054211 |
| H | 77.69893943 | 28.12164415 | 29.90881838 |
| H | 79.22099638 | 28.70468965 | 31.90795607 |
| H | 80.62264553 | 28.50425716 | 30.88076682 |
| H | 80.66602581 | 26.28864654 | 31.35192102 |
| H | 76.88366957 | 26.01674841 | 32.76691802 |
| H | 77.26780195 | 27.34689426 | 31.74845039 |
| H | 80.06079240 | 24.45465297 | 32.45794169 |
| H | 78.37053375 | 24.21798594 | 32.88214924 |
| H | 83.77130608 | 23.33937720 | 35.19570439 |
| H | 79.17184705 | 27.71627063 | 35.72147623 |
| H | 82.69769163 | 31.80576559 | 32.32777616 |
| H | 87.70795743 | 27.88904561 | 33.06110788 |
| H | 78.84479805 | 24.20248199 | 37.09303089 |
| H | 78.91436815 | 25.90996713 | 37.52920154 |
| H | 78.22544684 | 25.42656944 | 35.98069427 |
| H | 80.32339093 | 22.66716241 | 36.82023126 |
| H | 82.06388775 | 22.69335464 | 37.11572668 |
| H | 77.65946588 | 29.21777589 | 34.40202368 |
| H | 78.20426042 | 30.06507580 | 35.84758679 |
| H | 77.79108380 | 30.97937391 | 34.39795610 |
| H | 80.47615182 | 32.95922623 | 33.14265116 |
| H | 84.43322924 | 33.05024760 | 32.10354501 |
| H | 86.19657681 | 33.04235400 | 32.08516590 |
| H | 85.30121787 | 32.47286655 | 30.67997493 |
| H | 88.05897451 | 31.72068785 | 32.70699130 |
| H | 88.78433255 | 24.26801605 | 33.61414630 |
| H | 89.00012900 | 25.95740262 | 34.07669247 |
| H | 88.58318378 | 25.54554256 | 32.41193817 |

|    |             |             |             |
|----|-------------|-------------|-------------|
| H  | 85.72395962 | 22.24433442 | 33.95267142 |
| H  | 87.41958862 | 22.64344626 | 34.26138108 |
| Cl | 83.12375108 | 24.10857540 | 31.48360982 |
| O  | 82.84708926 | 27.18204664 | 32.52231096 |
| O  | 81.60106448 | 24.67528652 | 31.68535747 |
| H  | 83.70310898 | 29.23683679 | 41.56099399 |
| H  | 82.51120710 | 29.21773123 | 40.24832880 |
| H  | 81.44860892 | 22.21638830 | 35.53343734 |
| H  | 79.97177470 | 32.01680341 | 31.74198969 |
| H  | 78.85363984 | 32.26554147 | 33.09015474 |
| H  | 88.60573043 | 30.04477550 | 32.58172712 |
| H  | 88.01282951 | 30.89004024 | 31.14616202 |
| H  | 86.24982581 | 22.66918861 | 35.58858543 |
| H  | 84.91595873 | 30.70798632 | 37.95527512 |
| H  | 79.14520309 | 27.89614149 | 28.92418141 |

### Int1b<sub>II,21</sub>

|                                           |              |
|-------------------------------------------|--------------|
| Energy with the small basis set:          | -2626.256947 |
| Solution energy with the small basis set: | -2626.256955 |
| Energy with larger basis sets:            | -2626.933765 |
| Zero-point energy:                        | 0.777806     |
| Dispersion effect:                        | -0.179202415 |

|    |             |             |             |
|----|-------------|-------------|-------------|
| C  | -3.85625000 | 3.23949199  | 4.71847699  |
| C  | -4.14812629 | 2.87554104  | 3.24870312  |
| C  | -3.23651643 | 1.83268999  | 2.67444865  |
| N  | -3.11465042 | 0.55750933  | 3.20561335  |
| C  | -2.38977175 | 1.83653569  | 1.59443911  |
| C  | -2.23031296 | -0.14399983 | 2.45606486  |
| N  | -1.77166622 | 0.60523740  | 1.46868549  |
| C  | 5.84501197  | -0.92898699 | -0.47938001 |
| C  | 4.75458145  | 0.15116202  | -0.53080663 |
| N  | 3.65394437  | -0.14666824 | -1.45599115 |
| C  | 3.73654826  | -0.10133073 | -2.78423884 |
| N  | 4.84298003  | 0.37978003  | -3.39534248 |
| N  | 2.71568751  | -0.53051821 | -3.53051304 |
| Fe | -0.31721575 | -0.04147519 | -0.01550478 |
| C  | -1.51608265 | 2.20914153  | -2.30224074 |
| C  | 1.67330584  | 2.40613121  | 1.32866377  |
| C  | 1.05286463  | -2.31077063 | 2.14474515  |
| C  | -2.68953528 | -2.30832743 | -0.94989637 |
| N  | -0.02570396 | 1.93791862  | -0.38108669 |
| C  | -0.57857826 | 2.68515794  | -1.39344008 |

|   |             |             |             |
|---|-------------|-------------|-------------|
| C | -0.07364618 | 4.05289069  | -1.34882755 |
| C | 0.79258509  | 4.10569951  | -0.28665455 |
| C | 0.82933473  | 2.77405859  | 0.29083623  |
| C | 1.58402118  | 5.27362921  | 0.22415745  |
| C | -0.45058299 | 5.17028498  | -2.28765199 |
| N | 1.08700555  | 0.02988943  | 1.48293139  |
| C | 1.83158996  | 1.12210593  | 1.83496162  |
| C | 2.86825471  | 0.74394500  | 2.77883754  |
| C | 2.76039464  | -0.61204354 | 2.97301946  |
| C | 1.61402854  | -1.04027419 | 2.16710658  |
| C | 3.84000821  | 1.70690222  | 3.39725524  |
| C | 3.64410099  | -1.46863300 | 3.85567100  |
| N | -0.78900091 | -1.93645003 | 0.53603259  |
| C | -0.08893595 | -2.69820860 | 1.44034024  |
| C | -0.73178506 | -3.98752269 | 1.59862493  |
| C | -1.83534803 | -4.01494151 | 0.77817476  |
| C | -1.83420451 | -2.71772100 | 0.07688914  |
| C | -0.24485483 | -5.07123843 | 2.51585347  |
| C | -2.80047799 | -5.20471398 | 0.69008800  |
| N | -1.79724797 | -0.04689795 | -1.37460549 |
| C | -2.63652647 | -1.09823055 | -1.65241626 |
| C | -3.48346319 | -0.75847710 | -2.79700031 |
| C | -3.13692462 | 0.50943641  | -3.20791636 |
| C | -2.08722559 | 0.94154465  | -2.28975035 |
| C | -4.51734803 | -1.67661039 | -3.37897540 |
| C | -3.69932299 | 1.35088600  | -4.35857500 |
| H | -5.19154327 | 2.54284154  | 3.15709893  |
| H | -4.06139554 | 3.76915921  | 2.62271871  |
| H | -2.18649575 | 2.63850156  | 0.90358259  |
| H | -1.95250686 | -1.16656573 | 2.65319520  |
| H | -3.97639150 | 2.37693843  | 5.38365653  |
| H | 6.61693578  | -0.63669743 | 0.23910746  |
| H | 6.32872692  | -1.08172850 | -1.44916943 |
| H | 5.18324801  | 1.13458422  | -0.77111738 |
| H | 4.29180681  | 0.25888770  | 0.45241673  |
| H | 2.70809313  | -0.31464426 | -1.08226709 |
| H | 5.00077371  | 0.20700683  | -4.37492195 |
| H | 5.61120912  | 0.74592210  | -2.85902181 |
| H | 1.90735102  | -1.00983611 | -3.10324823 |
| H | 2.69511610  | -0.33450606 | -4.51854465 |
| H | -1.86203982 | 2.89922763  | -3.06431234 |
| H | 2.30996828  | 3.18067037  | 1.74143246  |
| H | 1.51444302  | -3.06590913 | 2.77246831  |
| H | -3.44773456 | -3.01823002 | -1.26465610 |

|    |             |             |             |
|----|-------------|-------------|-------------|
| H  | 1.38360421  | 6.17760903  | -0.35545262 |
| H  | 1.34501942  | 5.49670796  | 1.27086526  |
| H  | 2.66382562  | 5.08666594  | 0.17398983  |
| H  | 0.08587462  | 6.08934316  | -2.04281623 |
| H  | -1.52361350 | 5.39263559  | -2.24353851 |
| H  | 4.39883743  | 2.27072633  | 2.64058342  |
| H  | 3.32683718  | 2.44317256  | 4.02765730  |
| H  | 4.56905418  | 1.19417629  | 4.02872832  |
| H  | 3.12380382  | -1.78166710 | 4.76935268  |
| H  | -0.13555733 | -4.71632284 | 3.54731882  |
| H  | -0.93309892 | -5.91906363 | 2.53062233  |
| H  | 0.73438104  | -5.45365154 | 2.20218359  |
| H  | -3.04758106 | -5.56758935 | 1.69150018  |
| H  | -5.03318662 | -1.21151108 | -4.22236219 |
| H  | -5.27963876 | -1.94904982 | -2.63902140 |
| H  | -4.06991450 | -2.61007040 | -3.74097631 |
| H  | -2.90974101 | 1.63570468  | -5.06259777 |
| H  | -4.45816339 | 0.79440032  | -4.91260583 |
| Cl | 1.50011663  | -3.40506299 | -1.76019953 |
| O  | 0.87070667  | -0.46403844 | -1.06115568 |
| O  | 0.66830949  | -2.12980926 | -2.42024263 |
| H  | -4.54636075 | 4.01518876  | 5.06272252  |
| H  | -2.83459122 | 3.61280638  | 4.83586353  |
| H  | -0.21736026 | 4.91892029  | -3.32936997 |
| H  | 3.96595010  | -2.38092045 | 3.34092987  |
| H  | 4.53993254  | -0.92278039 | 4.15823753  |
| H  | -3.73688637 | -4.93462252 | 0.19357177  |
| H  | -2.35465949 | -6.03424508 | 0.13007151  |
| H  | -4.16253488 | 2.27160786  | -3.98657816 |
| H  | -3.60369087 | 0.20315590  | 4.01448114  |
| H  | 5.42285274  | -1.88561713 | -0.16007596 |

## TS<sub>II,21</sub>

|                                           |                       |
|-------------------------------------------|-----------------------|
| Energy with the small basis set:          | -2626.250959          |
| Solution energy with the small basis set: | -2626.251564          |
| Energy with larger basis sets:            | -2626.928675          |
| Zero-point energy:                        | 0.777043              |
| Dispersion effect:                        | -0.179881813          |
| Imaginary frequency:                      | -344 cm <sup>-1</sup> |

|   |             |            |            |
|---|-------------|------------|------------|
| C | -3.85625000 | 3.23949200 | 4.71847700 |
| C | -4.14114600 | 2.82608200 | 3.26119700 |
| C | -3.18915000 | 1.81205700 | 2.70068100 |



|    |             |             |             |
|----|-------------|-------------|-------------|
| N  | -2.95454000 | 0.58264900  | 3.29838500  |
| C  | -2.40953200 | 1.79820100  | 1.57093700  |
| C  | -2.07066600 | -0.10930000 | 2.54091800  |
| N  | -1.72047200 | 0.60173100  | 1.48272500  |
| C  | 5.84501200  | -0.92898700 | -0.47938000 |
| C  | 4.73994200  | 0.13013500  | -0.59012700 |
| N  | 3.66875700  | -0.20550000 | -1.53648400 |
| C  | 3.75393000  | -0.09792200 | -2.86218500 |
| N  | 4.87884600  | 0.37560700  | -3.44339300 |
| N  | 2.72095300  | -0.44953500 | -3.63122400 |
| Fe | -0.33110600 | -0.04791000 | -0.01501600 |
| C  | -1.51797500 | 2.20529200  | -2.30494000 |
| C  | 1.68186400  | 2.39898200  | 1.31589800  |
| C  | 1.06533500  | -2.32048400 | 2.12289400  |
| C  | -2.71307800 | -2.30179400 | -0.93220500 |
| N  | -0.02078500 | 1.93248000  | -0.39079200 |
| C  | -0.57518500 | 2.68100900  | -1.40042500 |
| C  | -0.06669100 | 4.04857400  | -1.35792600 |
| C  | 0.80602000  | 4.09816900  | -0.30187600 |
| C  | 0.83865100  | 2.76723500  | 0.27738600  |
| C  | 1.60268700  | 5.26258500  | 0.20623600  |
| C  | -0.45058300 | 5.17028500  | -2.28765200 |
| N  | 1.10361100  | 0.01996000  | 1.45954500  |
| C  | 1.84009400  | 1.11453300  | 1.82119500  |
| C  | 2.86781700  | 0.74008300  | 2.77694700  |
| C  | 2.76462700  | -0.61599600 | 2.96674100  |
| C  | 1.62575400  | -1.04772600 | 2.14990800  |
| C  | 3.82533800  | 1.70861700  | 3.40749800  |
| C  | 3.64410100  | -1.46863300 | 3.85567100  |
| N  | -0.79410600 | -1.93813100 | 0.53128900  |
| C  | -0.07901100 | -2.70496200 | 1.41968400  |
| C  | -0.71657700 | -3.99799300 | 1.57676800  |
| C  | -1.83303200 | -4.01935200 | 0.77476200  |
| C  | -1.84392600 | -2.71699400 | 0.08183700  |
| C  | -0.20647900 | -5.08804300 | 2.47293100  |
| C  | -2.80047800 | -5.20471400 | 0.69008800  |
| N  | -1.81529300 | -0.04427600 | -1.36124300 |
| C  | -2.66266700 | -1.09012600 | -1.63315000 |
| C  | -3.50713900 | -0.75018600 | -2.78028000 |
| C  | -3.15151000 | 0.51229300  | -3.19819100 |
| C  | -2.09721900 | 0.94122300  | -2.28242800 |
| C  | -4.54910100 | -1.66279000 | -3.35480400 |
| C  | -3.69932300 | 1.35088600  | -4.35857500 |
| H  | -5.16826400 | 2.44244800  | 3.18954100  |

|    |             |             |             |
|----|-------------|-------------|-------------|
| H  | -4.10290100 | 3.70712800  | 2.61311300  |
| H  | -2.30164200 | 2.56306300  | 0.81933300  |
| H  | -1.71202700 | -1.09584500 | 2.78454700  |
| H  | -3.92714000 | 2.38897000  | 5.40559500  |
| H  | 6.58465600  | -0.61166400 | 0.26134500  |
| H  | 6.36638300  | -1.09089200 | -1.42808000 |
| H  | 5.16014200  | 1.11180400  | -0.84799700 |
| H  | 4.25046400  | 0.25622900  | 0.37763600  |
| H  | 2.72964300  | -0.40707200 | -1.16994500 |
| H  | 5.00530200  | 0.31405500  | -4.44020300 |
| H  | 5.67964400  | 0.62853900  | -2.89049100 |
| H  | 1.86493200  | -0.87038700 | -3.22924400 |
| H  | 2.75034800  | -0.27986000 | -4.62362900 |
| H  | -1.86344000 | 2.89325100  | -3.06867400 |
| H  | 2.31865500  | 3.17251900  | 1.72907800  |
| H  | 1.52881100  | -3.07633400 | 2.74737700  |
| H  | -3.47390200 | -3.01010000 | -1.24283600 |
| H  | 1.43600800  | 6.15668300  | -0.39804200 |
| H  | 1.33685800  | 5.51265000  | 1.24004100  |
| H  | 2.67937500  | 5.05571700  | 0.19202000  |
| H  | 0.08831200  | 6.08752500  | -2.04347700 |
| H  | -1.52268800 | 5.39253100  | -2.23221300 |
| H  | 4.39912500  | 2.26646900  | 2.65799800  |
| H  | 3.29792200  | 2.44890000  | 4.02064000  |
| H  | 4.54115500  | 1.20253700  | 4.05842300  |
| H  | 3.11588700  | -1.79090300 | 4.76129400  |
| H  | -0.07430200 | -4.74215800 | 3.50446600  |
| H  | -0.88951700 | -5.93929300 | 2.49623300  |
| H  | 0.76602500  | -5.46340900 | 2.13208000  |
| H  | -2.92076800 | -5.66668700 | 1.67248900  |
| H  | -5.06734500 | -1.19532500 | -4.19486600 |
| H  | -5.30782500 | -1.92898600 | -2.60953000 |
| H  | -4.10989800 | -2.59894600 | -3.71867400 |
| H  | -2.90592700 | 1.60342700  | -5.06994700 |
| H  | -4.47501800 | 0.80627300  | -4.90009800 |
| Cl | 1.21386800  | -3.21872400 | -2.04582200 |
| O  | 0.88331600  | -0.46338200 | -1.07264000 |
| O  | 0.52895600  | -1.73088000 | -2.44544300 |
| H  | -4.58392200 | 3.98519200  | 5.04991200  |
| H  | -2.85504300 | 3.66860300  | 4.81850000  |
| H  | -0.22742800 | 4.92346700  | -3.33230400 |
| H  | 3.97943300  | -2.37554300 | 3.34060700  |
| H  | 4.53179900  | -0.91800200 | 4.17180900  |
| H  | -3.79122800 | -4.89527000 | 0.34510900  |

|   |             |             |             |
|---|-------------|-------------|-------------|
| H | -2.43343400 | -5.97059100 | -0.00232300 |
| H | -4.13662800 | 2.28834100  | -3.99832100 |
| H | -3.36834800 | 0.25316300  | 4.15781300  |
| H | 5.42703900  | -1.88741900 | -0.16076100 |

## Int2<sub>II,21</sub>

|                                           |              |
|-------------------------------------------|--------------|
| Energy with the small basis set:          | -2626.280304 |
| Solution energy with the small basis set: | -2626.280317 |
| Energy with larger basis sets:            | -2626.950567 |
| Zero-point energy:                        | 0.778377     |
| Dispersion effect:                        | -0.179114872 |

|    |             |             |             |
|----|-------------|-------------|-------------|
| C  | 83.56100000 | 29.40899994 | 40.48999982 |
| C  | 84.47573467 | 28.52114851 | 39.62228692 |
| C  | 84.25352723 | 28.67152918 | 38.14707738 |
| N  | 84.29673325 | 29.90042582 | 37.50184942 |
| C  | 83.98229799 | 27.76900440 | 37.15078334 |
| C  | 84.05366228 | 29.71614609 | 36.18641421 |
| N  | 83.86065612 | 28.42970551 | 35.94156366 |
| C  | 78.74700012 | 28.42299993 | 29.79600018 |
| C  | 78.97973349 | 27.62118142 | 31.08315951 |
| N  | 80.17423244 | 26.76974961 | 31.04214344 |
| C  | 80.28058576 | 25.63384520 | 30.35842628 |
| N  | 79.21193701 | 25.09538608 | 29.73325206 |
| N  | 81.45950787 | 25.00308701 | 30.30104963 |
| Fe | 83.36116333 | 27.70712687 | 34.12844825 |
| C  | 83.69505346 | 24.38930649 | 34.99564834 |
| C  | 80.14538654 | 27.67130284 | 35.24794303 |
| C  | 82.86065706 | 30.84035913 | 32.81498340 |
| C  | 86.65739954 | 27.85157425 | 33.31810787 |
| N  | 82.17816733 | 26.31480172 | 34.99386207 |
| C  | 82.47612004 | 24.99744460 | 35.27294131 |
| C  | 81.34610712 | 24.34437776 | 35.91640878 |
| C  | 80.36575858 | 25.29940719 | 36.02674674 |
| C  | 80.89055160 | 26.51253131 | 35.42748691 |
| C  | 78.99703158 | 25.17122096 | 36.62580507 |
| C  | 81.28900002 | 22.90700050 | 36.36999976 |
| N  | 81.79607813 | 29.01342771 | 34.02700028 |
| C  | 80.54805345 | 28.80518934 | 34.55096184 |
| C  | 79.66705178 | 29.91299777 | 34.22165377 |
| C  | 80.39747980 | 30.79424643 | 33.45990587 |
| C  | 81.74469188 | 30.22667854 | 33.37607847 |
| C  | 78.23591784 | 30.01441409 | 34.66598995 |

|   |             |             |             |
|---|-------------|-------------|-------------|
| C | 79.89800017 | 32.07999963 | 32.83400012 |
| N | 84.55168903 | 29.09374586 | 33.26408933 |
| C | 84.16371367 | 30.33548970 | 32.81483759 |
| C | 85.31838267 | 31.08426512 | 32.36821244 |
| C | 86.43143311 | 30.29491603 | 32.54866844 |
| C | 85.92335703 | 29.01922343 | 33.08608313 |
| C | 85.27050648 | 32.47699217 | 31.81232557 |
| C | 87.85999977 | 30.75899988 | 32.22300010 |
| N | 84.86802074 | 26.36425337 | 34.13242296 |
| C | 86.16112604 | 26.61251104 | 33.74602538 |
| C | 86.94916048 | 25.37937240 | 33.83480681 |
| C | 86.10691729 | 24.38183992 | 34.27399207 |
| C | 84.81417352 | 25.02803942 | 34.47055122 |
| C | 88.40235612 | 25.28083592 | 33.47662637 |
| C | 86.39099993 | 22.89700011 | 34.52600000 |
| H | 85.52629070 | 28.73743754 | 39.86130095 |
| H | 84.31897349 | 27.46794149 | 39.87602197 |
| H | 83.86247897 | 26.69992543 | 37.21741892 |
| H | 84.01821143 | 30.50827548 | 35.45611070 |
| H | 83.72763396 | 30.47560335 | 40.30134025 |
| H | 77.85707827 | 29.05035640 | 29.90617144 |
| H | 78.59786039 | 27.77686225 | 28.92510149 |
| H | 78.10117920 | 27.01157637 | 31.33686818 |
| H | 79.13060493 | 28.29876705 | 31.92590132 |
| H | 81.00089958 | 27.04131867 | 31.59823680 |
| H | 79.31154712 | 24.29307670 | 29.13320779 |
| H | 78.30411879 | 25.52436961 | 29.79277578 |
| H | 82.30478259 | 25.46943859 | 30.64789828 |
| H | 81.55226457 | 24.12384106 | 29.81880967 |
| H | 83.79409993 | 23.33906686 | 35.24583964 |
| H | 79.13285188 | 27.66633257 | 35.63463286 |
| H | 82.71586038 | 31.81997161 | 32.37140519 |
| H | 87.71811882 | 27.89451980 | 33.09495192 |
| H | 78.81370982 | 24.16084076 | 36.99819092 |
| H | 78.86127622 | 25.85973807 | 37.46805765 |
| H | 78.21204517 | 25.39764943 | 35.89447842 |
| H | 80.30322376 | 22.65701736 | 36.76779160 |
| H | 82.02443484 | 22.70055514 | 37.15706489 |
| H | 77.63373747 | 29.16793161 | 34.31321959 |
| H | 78.15670660 | 30.02527817 | 35.75979573 |
| H | 77.76181308 | 30.92693907 | 34.29765972 |
| H | 80.49523813 | 32.94430689 | 33.14811118 |
| H | 84.71992323 | 33.16205079 | 32.46718065 |
| H | 86.27424838 | 32.88621696 | 31.67832198 |

|    |             |             |             |
|----|-------------|-------------|-------------|
| H  | 84.77668967 | 32.49904134 | 30.83328654 |
| H  | 88.06800699 | 31.71712683 | 32.70869435 |
| H  | 88.78898035 | 24.27433323 | 33.65386028 |
| H  | 89.01251570 | 25.97516346 | 34.06682749 |
| H  | 88.57401459 | 25.51854238 | 32.41977169 |
| H  | 85.77280972 | 22.26453224 | 33.87987215 |
| H  | 87.43789431 | 22.66055138 | 34.32390179 |
| Cl | 83.91731881 | 27.87999075 | 30.16972508 |
| O  | 82.63230698 | 27.03574910 | 32.42814062 |
| O  | 83.49551075 | 26.57261687 | 31.51470724 |
| H  | 83.75917750 | 29.23343343 | 41.55100134 |
| H  | 82.50553139 | 29.19422603 | 40.29834570 |
| H  | 81.49808409 | 22.21473878 | 35.54568158 |
| H  | 79.94525624 | 32.04050456 | 31.73906301 |
| H  | 78.86250439 | 32.27625393 | 33.11662782 |
| H  | 88.60965647 | 30.04132511 | 32.56616474 |
| H  | 87.99153375 | 30.89032798 | 31.14377698 |
| H  | 86.17898486 | 22.62239046 | 35.56517137 |
| H  | 84.47830749 | 30.79223564 | 37.93877405 |
| H  | 79.60296711 | 29.07122754 | 29.58994821 |

### Int2b<sub>II,21</sub>

|                                           |              |
|-------------------------------------------|--------------|
| Energy with the small basis set:          | -2626.279397 |
| Solution energy with the small basis set: | -2626.279414 |
| Energy with larger basis sets:            | -2626.951456 |
| Zero-point energy:                        | 0.775336     |
| Dispersion effect:                        | -0.174979088 |

|    |             |             |             |
|----|-------------|-------------|-------------|
| C  | 83.56100001 | 29.40899995 | 40.48999990 |
| C  | 84.34326405 | 28.39628140 | 39.63295365 |
| C  | 84.18604241 | 28.59327868 | 38.15565095 |
| N  | 84.45664646 | 29.79390281 | 37.51661531 |
| C  | 83.80000945 | 27.74575715 | 37.14973322 |
| C  | 84.24038925 | 29.64584463 | 36.18983435 |
| N  | 83.84124830 | 28.40990194 | 35.93759139 |
| C  | 78.74700000 | 28.42299994 | 29.79600002 |
| C  | 79.63520768 | 27.40122830 | 30.51178819 |
| N  | 80.85718139 | 27.08517710 | 29.76888907 |
| C  | 80.96668136 | 26.23033841 | 28.75657369 |
| N  | 79.92165339 | 25.46916469 | 28.36921708 |
| N  | 82.13824844 | 26.12120675 | 28.11821981 |
| Fe | 83.35600536 | 27.68273624 | 34.11950617 |
| C  | 83.69754190 | 24.39860207 | 35.01996425 |

|   |             |             |             |
|---|-------------|-------------|-------------|
| C | 80.07418134 | 27.60570916 | 35.11380221 |
| C | 82.86981408 | 30.83553460 | 32.86030378 |
| C | 86.66475536 | 27.83993815 | 33.29550828 |
| N | 82.14257501 | 26.29472039 | 34.93775185 |
| C | 82.46402142 | 24.99315119 | 35.25884717 |
| C | 81.33021575 | 24.33129304 | 35.88787009 |
| C | 80.32354667 | 25.26152622 | 35.94578805 |
| C | 80.83570862 | 26.46837828 | 35.33240632 |
| C | 78.94155791 | 25.11324100 | 36.50896123 |
| C | 81.28900004 | 22.90700055 | 36.36999978 |
| N | 81.76872305 | 28.96775559 | 33.98064132 |
| C | 80.49616545 | 28.74536855 | 34.44298652 |
| C | 79.62765074 | 29.85570380 | 34.10968880 |
| C | 80.38795806 | 30.76910001 | 33.41971691 |
| C | 81.74101501 | 30.20565163 | 33.37188287 |
| C | 78.17372759 | 29.92494247 | 34.47665766 |
| C | 79.89800021 | 32.07999956 | 32.83400019 |
| N | 84.56410455 | 29.08065532 | 33.27569488 |
| C | 84.17160148 | 30.32837600 | 32.85525514 |
| C | 85.32334404 | 31.08840631 | 32.41231294 |
| C | 86.43697693 | 30.29520089 | 32.56246914 |
| C | 85.93404903 | 29.01188308 | 33.07956794 |
| C | 85.26585503 | 32.48752832 | 31.87515362 |
| C | 87.85999982 | 30.75899989 | 32.22300010 |
| N | 84.87185187 | 26.36659542 | 34.13703477 |
| C | 86.16708617 | 26.60730051 | 33.73333030 |
| C | 86.94687496 | 25.37533891 | 33.82439906 |
| C | 86.10559556 | 24.38392220 | 34.28274089 |
| C | 84.81624110 | 25.03426254 | 34.49087885 |
| C | 88.39521345 | 25.26576143 | 33.44804486 |
| C | 86.39099994 | 22.89700011 | 34.52600000 |
| H | 85.40870196 | 28.43800439 | 39.89879028 |
| H | 84.01324731 | 27.37924433 | 39.86764561 |
| H | 83.50477538 | 26.71150783 | 37.21204660 |
| H | 84.36707748 | 30.42945990 | 35.46106426 |
| H | 83.89702625 | 30.43766775 | 40.31673331 |
| H | 77.87150813 | 28.65481943 | 30.41046229 |
| H | 78.39417583 | 28.05192205 | 28.82829454 |
| H | 79.08891027 | 26.47467336 | 30.72989645 |
| H | 79.96658141 | 27.78558971 | 31.47920468 |
| H | 81.70869157 | 27.60774785 | 29.99433871 |
| H | 79.98659483 | 24.87136140 | 27.56180351 |
| H | 79.04611360 | 25.49552985 | 28.86374906 |
| H | 82.90940088 | 26.73389790 | 28.40096941 |

|    |             |             |             |
|----|-------------|-------------|-------------|
| H  | 82.28587954 | 25.43425551 | 27.39712109 |
| H  | 83.80397943 | 23.35401050 | 35.28962307 |
| H  | 79.04703010 | 27.58519704 | 35.45832511 |
| H  | 82.73234469 | 31.82735108 | 32.44259031 |
| H  | 87.72365584 | 27.87783945 | 33.06267642 |
| H  | 78.78778247 | 24.12214296 | 36.94153094 |
| H  | 78.74969362 | 25.84830701 | 37.29906936 |
| H  | 78.17343839 | 25.25699103 | 35.73967642 |
| H  | 80.30467617 | 22.65199664 | 36.76787096 |
| H  | 82.02334378 | 22.72500928 | 37.16425724 |
| H  | 77.60281891 | 29.10208007 | 34.02992742 |
| H  | 78.02961019 | 29.86155354 | 35.56180863 |
| H  | 77.71517842 | 30.85830462 | 34.14319076 |
| H  | 80.44862500 | 32.93696879 | 33.24029354 |
| H  | 84.73530272 | 33.16683027 | 32.55256197 |
| H  | 86.26721988 | 32.89479863 | 31.71874038 |
| H  | 84.74540359 | 32.52155547 | 30.91014638 |
| H  | 88.06763317 | 31.72439155 | 32.69353598 |
| H  | 88.77885106 | 24.25912396 | 33.63038297 |
| H  | 89.01657536 | 25.96215917 | 34.02378708 |
| H  | 88.55457742 | 25.49178867 | 32.38682021 |
| H  | 85.77331727 | 22.26968369 | 33.87456800 |
| H  | 87.43820317 | 22.66283826 | 34.32415383 |
| Cl | 83.88321955 | 28.23813967 | 29.80470848 |
| O  | 82.75076986 | 27.03714671 | 32.35909855 |
| O  | 83.62195861 | 26.67996510 | 31.52492808 |
| H  | 83.70508832 | 29.19702466 | 41.55317447 |
| H  | 82.48936714 | 29.36464284 | 40.27433753 |
| H  | 81.51095828 | 22.20061069 | 35.56095918 |
| H  | 80.02310975 | 32.10755635 | 31.74486831 |
| H  | 78.84047455 | 32.23242917 | 33.05347947 |
| H  | 88.61412677 | 30.04916020 | 32.57284684 |
| H  | 87.98631722 | 30.87433549 | 31.14130020 |
| H  | 86.17686732 | 22.61539758 | 35.56283145 |
| H  | 84.76210541 | 30.64685304 | 37.96186770 |
| H  | 79.29657907 | 29.35228236 | 29.62251318 |

## Prod<sub>II,21</sub>

|                                           |              |
|-------------------------------------------|--------------|
| Energy with the small basis set:          | -2626.299021 |
| Solution energy with the small basis set: | -2626.298884 |
| Energy with larger basis sets:            | -2626.951456 |
| Zero-point energy:                        | 0.776381     |
| Dispersion effect:                        | -0.17147725  |

|    |             |             |             |
|----|-------------|-------------|-------------|
| C  | 83.56100001 | 29.40899993 | 40.48999981 |
| C  | 84.48862423 | 28.51128841 | 39.65180236 |
| C  | 84.25232889 | 28.65326774 | 38.18099455 |
| N  | 84.23766001 | 29.89237269 | 37.55254885 |
| C  | 83.98753462 | 27.75116201 | 37.18436698 |
| C  | 83.97232804 | 29.72403050 | 36.24383505 |
| N  | 83.81677583 | 28.43212083 | 35.99198921 |
| C  | 78.74700019 | 28.42299984 | 29.79600017 |
| C  | 79.63196763 | 27.23916036 | 29.39440687 |
| N  | 80.86210607 | 27.69149592 | 28.74053862 |
| C  | 81.06786615 | 27.79715139 | 27.42815716 |
| N  | 80.39536670 | 27.02937659 | 26.53956906 |
| N  | 81.97821578 | 28.67159684 | 26.99215242 |
| Fe | 83.40355335 | 27.74224669 | 34.22735853 |
| C  | 83.71248858 | 24.39585702 | 35.02273900 |
| C  | 80.12445977 | 27.62783066 | 35.14963500 |
| C  | 82.88033539 | 30.85442143 | 32.86276085 |
| C  | 86.67554931 | 27.87017688 | 33.36512976 |
| N  | 82.18055066 | 26.30378983 | 34.94315505 |
| C  | 82.48363267 | 24.99316869 | 35.26608553 |
| C  | 81.35060984 | 24.33805994 | 35.89885433 |
| C  | 80.35670806 | 25.28118487 | 35.96712444 |
| C  | 80.87936896 | 26.48585454 | 35.35837628 |
| C  | 78.97207566 | 25.14492981 | 36.52539757 |
| C  | 81.28900003 | 22.90700071 | 36.36999968 |
| N  | 81.80760555 | 28.98257428 | 33.98993440 |
| C  | 80.54013543 | 28.76446140 | 34.47202011 |
| C  | 79.66140934 | 29.86728802 | 34.14185218 |
| C  | 80.40633398 | 30.78368410 | 33.44065941 |
| C  | 81.75935341 | 30.22806852 | 33.38458508 |
| C  | 78.20753734 | 29.92065372 | 34.51044225 |
| C  | 79.89800025 | 32.07999953 | 32.83400021 |
| N  | 84.57277854 | 29.11615680 | 33.34074509 |
| C  | 84.18421063 | 30.35213928 | 32.87802138 |
| C  | 85.32767268 | 31.09156220 | 32.39802193 |
| C  | 86.44261812 | 30.30834388 | 32.58480791 |



|   |             |             |             |
|---|-------------|-------------|-------------|
| C | 85.94496416 | 29.04249950 | 33.14693652 |
| C | 85.24741525 | 32.43980542 | 31.74952243 |
| C | 87.85999965 | 30.75899981 | 32.22300015 |
| N | 84.88118517 | 26.38167216 | 34.17249843 |
| C | 86.18231431 | 26.62785474 | 33.79045015 |
| C | 86.96187316 | 25.39367744 | 33.86564636 |
| C | 86.11678590 | 24.39152266 | 34.29930213 |
| C | 84.83149459 | 25.03709117 | 34.50649085 |
| C | 88.41301574 | 25.29182391 | 33.49914893 |
| C | 86.39099988 | 22.89700019 | 34.52599995 |
| H | 85.53721354 | 28.74053327 | 39.88558287 |
| H | 84.33849396 | 27.46078681 | 39.91903747 |
| H | 83.90364756 | 26.67792362 | 37.23561220 |
| H | 83.89543269 | 30.52087382 | 35.52151337 |
| H | 83.72581249 | 30.47333440 | 40.28792848 |
| H | 77.87191785 | 28.06939920 | 30.35128189 |
| H | 78.39877033 | 28.96955211 | 28.91403258 |
| H | 79.08726824 | 26.54967199 | 28.74162061 |
| H | 79.92631031 | 26.66307140 | 30.27761960 |
| H | 81.43077152 | 28.37142550 | 29.28958570 |
| H | 80.47719670 | 27.19638077 | 25.55034893 |
| H | 79.86083093 | 26.23295578 | 26.84201796 |
| H | 82.35645318 | 29.34910670 | 27.67940840 |
| H | 82.32621951 | 28.64058429 | 26.04749006 |
| H | 83.81565598 | 23.34727011 | 35.28016368 |
| H | 79.09929632 | 27.61086406 | 35.50145812 |
| H | 82.73630379 | 31.82321175 | 32.40075392 |
| H | 87.73473676 | 27.91112413 | 33.13296799 |
| H | 78.82764842 | 24.17634998 | 37.00872129 |
| H | 78.76233112 | 25.91861175 | 37.27238266 |
| H | 78.21108990 | 25.23502994 | 35.74106971 |
| H | 80.34203931 | 22.69818503 | 36.87135903 |
| H | 82.09531953 | 22.67612834 | 37.07616366 |
| H | 77.64358998 | 29.09712149 | 34.05574570 |
| H | 78.06365784 | 29.84893268 | 35.59525784 |
| H | 77.74355618 | 30.85329188 | 34.18337458 |
| H | 80.35287391 | 32.95609743 | 33.31074096 |
| H | 84.78027435 | 33.18753222 | 32.40126956 |
| H | 86.23733372 | 32.81141094 | 31.47661788 |
| H | 84.64601837 | 32.37640524 | 30.83544686 |
| H | 88.05445862 | 31.75658373 | 32.62686327 |
| H | 88.79302371 | 24.27995267 | 33.65799541 |
| H | 89.03034658 | 25.97173840 | 34.09854095 |
| H | 88.58201952 | 25.54548386 | 32.44563476 |

|    |             |             |             |
|----|-------------|-------------|-------------|
| H  | 85.74600689 | 22.28012090 | 33.89124369 |
| H  | 87.42844202 | 22.65165533 | 34.28996353 |
| Cl | 82.45248793 | 30.14685148 | 29.68409290 |
| O  | 83.02234115 | 27.02429817 | 32.09583741 |
| O  | 83.63384889 | 27.39288090 | 31.10420190 |
| H  | 83.74372481 | 29.25446533 | 41.55708659 |
| H  | 82.50894041 | 29.18643589 | 40.28873389 |
| H  | 81.38166257 | 22.20353918 | 35.53356453 |
| H  | 80.13984569 | 32.12546793 | 31.76645876 |
| H  | 78.81627744 | 32.16147103 | 32.94600867 |
| H  | 88.62031570 | 30.08327665 | 32.62446174 |
| H  | 87.99274878 | 30.80292568 | 31.13648175 |
| H  | 86.20716752 | 22.61361931 | 35.56812108 |
| H  | 84.39352265 | 30.78373042 | 38.00116753 |
| H  | 79.30663247 | 29.11832450 | 30.42718779 |

### **Prod<sub>II,41</sub>**

|                                           |              |
|-------------------------------------------|--------------|
| Energy with the small basis set:          | -2626.291223 |
| Solution energy with the small basis set: | -2626.291151 |
| Energy with larger basis sets:            | -2626.961267 |
| Zero-point energy:                        | 0.776581     |
| Dispersion effect:                        | -0.173553231 |

|    |             |             |             |
|----|-------------|-------------|-------------|
| C  | 83.56100001 | 29.40899993 | 40.48999982 |
| C  | 84.22466296 | 28.27319682 | 39.69113465 |
| C  | 84.20605260 | 28.48352587 | 38.20871454 |
| N  | 84.86924881 | 29.52284889 | 37.57215621 |
| C  | 83.60016161 | 27.78673119 | 37.19819234 |
| C  | 84.66775797 | 29.42971556 | 36.24031542 |
| N  | 83.89719726 | 28.38061332 | 35.98305876 |
| C  | 78.74700018 | 28.42299985 | 29.79600019 |
| C  | 79.37899043 | 27.13584715 | 30.32990998 |
| N  | 80.71728683 | 26.92323585 | 29.77172172 |
| C  | 80.98296342 | 26.38225153 | 28.58055747 |
| N  | 80.13357742 | 25.50925881 | 27.99425107 |
| N  | 82.13999822 | 26.69089830 | 27.98937794 |
| Fe | 83.38848596 | 27.71632738 | 34.20234027 |
| C  | 83.72198224 | 24.41297936 | 35.06596543 |
| C  | 80.06025165 | 27.56984497 | 35.02817378 |
| C  | 82.88982499 | 30.86205766 | 32.92928007 |
| C  | 86.67462431 | 27.83996469 | 33.28527128 |
| N  | 82.15671226 | 26.29565191 | 34.92811295 |

|   |             |             |             |
|---|-------------|-------------|-------------|
| C | 82.48288684 | 24.99930832 | 35.28079047 |
| C | 81.33980856 | 24.33003413 | 35.88350012 |
| C | 80.31841603 | 25.24587315 | 35.89324994 |
| C | 80.83247870 | 26.44916402 | 35.28136290 |
| C | 78.91547971 | 25.08276096 | 36.39714536 |
| C | 81.28900001 | 22.90700060 | 36.36999972 |
| N | 81.78636101 | 28.94927300 | 33.95816431 |
| C | 80.49532345 | 28.71125152 | 34.37465646 |
| C | 79.62750626 | 29.81829902 | 34.04006859 |
| C | 80.39825336 | 30.76239630 | 33.40679265 |
| C | 81.75834572 | 30.21336238 | 33.39248869 |
| C | 78.15831076 | 29.85144876 | 34.34482709 |
| C | 79.89800019 | 32.07999962 | 32.83400016 |
| N | 84.57138389 | 29.08568619 | 33.31158998 |
| C | 84.18640329 | 30.34840610 | 32.92365560 |
| C | 85.33449239 | 31.10756399 | 32.47975448 |
| C | 86.44488891 | 30.30257947 | 32.59470189 |
| C | 85.94403326 | 29.01481960 | 33.09291037 |
| C | 85.27304491 | 32.50650416 | 31.94379688 |
| C | 87.85999972 | 30.75899986 | 32.22300012 |
| N | 84.88751120 | 26.37995383 | 34.16045448 |
| C | 86.17982549 | 26.60837438 | 33.73162410 |
| C | 86.95009441 | 25.37287788 | 33.80629875 |
| C | 86.11216532 | 24.38779199 | 34.28998137 |
| C | 84.83492250 | 25.04600375 | 34.52499229 |
| C | 88.38682160 | 25.25099393 | 33.39135498 |
| C | 86.39099990 | 22.89700015 | 34.52599996 |
| H | 85.26060205 | 28.13718992 | 40.02995286 |
| H | 83.71221029 | 27.32788243 | 39.89601638 |
| H | 82.98984728 | 26.90232009 | 37.25808510 |
| H | 85.07438616 | 30.11074400 | 35.51207527 |
| H | 84.07267723 | 30.36604921 | 40.33902978 |
| H | 77.78393419 | 28.61064739 | 30.28256442 |
| H | 78.57629135 | 28.35943658 | 28.71637836 |
| H | 78.74129850 | 26.26560714 | 30.13697656 |
| H | 79.50192565 | 27.18786449 | 31.41570828 |
| H | 81.41001895 | 27.65706804 | 30.03036952 |
| H | 80.29042489 | 25.18846906 | 27.05320673 |
| H | 79.31063625 | 25.18426410 | 28.47224454 |
| H | 82.64880386 | 27.51920248 | 28.35285932 |
| H | 82.43039217 | 26.24174158 | 27.13589265 |
| H | 83.83242961 | 23.37110559 | 35.34423143 |
| H | 79.02265773 | 27.53769728 | 35.33716303 |
| H | 82.75765151 | 31.85843905 | 32.52367819 |

|    |             |             |             |
|----|-------------|-------------|-------------|
| H  | 87.72910267 | 27.87451636 | 33.03301848 |
| H  | 78.77076841 | 24.11212514 | 36.87622997 |
| H  | 78.66147550 | 25.85272450 | 37.13425512 |
| H  | 78.18385033 | 25.15753756 | 35.58388932 |
| H  | 80.32127241 | 22.67777161 | 36.82007743 |
| H  | 82.06024527 | 22.70555994 | 37.12301304 |
| H  | 77.62066270 | 29.05009274 | 33.82403476 |
| H  | 77.96577642 | 29.72540390 | 35.41681452 |
| H  | 77.70390519 | 30.79713962 | 34.04323733 |
| H  | 80.42807664 | 32.93656443 | 33.26674499 |
| H  | 84.73359695 | 33.18286623 | 32.61658734 |
| H  | 86.27263428 | 32.91965405 | 31.79171123 |
| H  | 84.75663166 | 32.52694213 | 30.97644526 |
| H  | 88.07934784 | 31.72781155 | 32.68091560 |
| H  | 88.76180718 | 24.23710833 | 33.54878301 |
| H  | 89.03165932 | 25.93054475 | 33.96148800 |
| H  | 88.52202002 | 25.49098213 | 32.32998437 |
| H  | 85.73240293 | 22.27390017 | 33.91141376 |
| H  | 87.42322667 | 22.64950993 | 34.27075984 |
| Cl | 82.82303920 | 29.18225429 | 29.71059351 |
| O  | 82.99602595 | 26.74328499 | 32.17711115 |
| O  | 83.73561752 | 26.86694107 | 31.21255221 |
| H  | 83.59008451 | 29.18804380 | 41.56069709 |
| H  | 82.51547956 | 29.53772804 | 40.19520384 |
| H  | 81.44815145 | 22.19599740 | 35.54999070 |
| H  | 80.04868385 | 32.12027022 | 31.74914742 |
| H  | 78.83423073 | 32.20938835 | 33.03472675 |
| H  | 88.62123706 | 30.05039003 | 32.56072767 |
| H  | 87.96191502 | 30.86704052 | 31.13790828 |
| H  | 86.22855668 | 22.62375456 | 35.57439974 |
| H  | 85.41772424 | 30.24111057 | 38.02332809 |
| H  | 79.40911505 | 29.27198591 | 29.98563973 |

### **TS<sub>II,hetero</sub>**

|                                           |                       |
|-------------------------------------------|-----------------------|
| Energy with the small basis set:          | -2626.201775          |
| Solution energy with the small basis set: | -2626.202627          |
| Energy with larger basis sets:            | -2626.881462          |
| Zero-point energy:                        | 0.777410              |
| Dispersion effect:                        | -0.176435028          |
| Imaginary frequency:                      | -316 cm <sup>-1</sup> |

|   |            |            |             |
|---|------------|------------|-------------|
| C | 4.81579500 | 4.35547800 | -2.51176900 |
| C | 4.82180100 | 3.40182300 | -1.30147400 |

|    |             |             |             |
|----|-------------|-------------|-------------|
| C  | 3.74942100  | 2.35405000  | -1.32814000 |
| N  | 3.56708200  | 1.48572100  | -2.39436600 |
| C  | 2.79014800  | 1.98568400  | -0.41803200 |
| C  | 2.54060900  | 0.65063900  | -2.10608600 |
| N  | 2.04789000  | 0.92786200  | -0.91121500 |
| C  | -5.74251700 | -0.67116400 | -1.18385800 |
| C  | -4.58052200 | -0.14724100 | -0.33138600 |
| N  | -4.28046100 | -0.98405300 | 0.83314600  |
| C  | -4.86963800 | -0.90685600 | 2.02400000  |
| N  | -5.97017900 | -0.14387700 | 2.20973000  |
| N  | -4.35585700 | -1.59206600 | 3.05222700  |
| Fe | 0.39153500  | -0.06972300 | -0.02721800 |
| C  | 1.01734500  | 1.19009400  | 3.09157800  |
| C  | -1.31264400 | 2.78973200  | -0.83251200 |
| C  | -0.50921600 | -1.42707500 | -3.03375700 |
| C  | 2.54855200  | -2.65616600 | 0.54001900  |
| N  | -0.00518200 | 1.67694500  | 0.92425800  |
| C  | 0.29945800  | 2.00480100  | 2.22244200  |
| C  | -0.20454000 | 3.33658600  | 2.54317900  |
| C  | -0.82061800 | 3.79398500  | 1.40754200  |
| C  | -0.70953000 | 2.73819000  | 0.41644400  |
| C  | -1.50474800 | 5.10762400  | 1.17289900  |
| C  | -0.05427300 | 4.05179800  | 3.86024900  |
| N  | -0.71310300 | 0.55943900  | -1.64420900 |
| C  | -1.35929300 | 1.75668800  | -1.76038900 |
| C  | -2.15317200 | 1.78946600  | -2.97770800 |
| C  | -1.99482600 | 0.57356700  | -3.59255400 |
| C  | -1.06058500 | -0.18237500 | -2.74757600 |
| C  | -2.96613000 | 2.97048200  | -3.41868600 |
| C  | -2.64437500 | 0.12661300  | -4.88425800 |
| N  | 0.96826200  | -1.71460900 | -1.06504400 |
| C  | 0.45928000  | -2.10077600 | -2.28152700 |
| C  | 1.12169200  | -3.31089300 | -2.73022700 |
| C  | 2.05126900  | -3.66059000 | -1.77970400 |
| C  | 1.91189700  | -2.65899700 | -0.70680400 |
| C  | 0.81936200  | -4.01893500 | -4.01808000 |
| C  | 2.99274000  | -4.86194900 | -1.90953300 |
| N  | 1.51513400  | -0.64388400 | 1.53096600  |
| C  | 2.33088800  | -1.75433100 | 1.59034500  |
| C  | 2.91350900  | -1.86055200 | 2.92736100  |
| C  | 2.44167500  | -0.80126300 | 3.67255100  |
| C  | 1.59530100  | -0.03315600 | 2.76837900  |
| C  | 3.84042700  | -2.95970300 | 3.35394000  |
| C  | 2.70341200  | -0.44216900 | 5.13707200  |

|    |             |             |             |
|----|-------------|-------------|-------------|
| H  | 5.80557600  | 2.91811100  | -1.22757500 |
| H  | 4.69844000  | 3.97591600  | -0.37796400 |
| H  | 2.58605100  | 2.40783700  | 0.55267800  |
| H  | 2.18595400  | -0.12072300 | -2.77017100 |
| H  | 4.99309200  | 3.82287300  | -3.45280400 |
| H  | -5.89061800 | -0.01829200 | -2.04898800 |
| H  | -6.68364000 | -0.71168100 | -0.62540100 |
| H  | -4.76920500 | 0.87895700  | 0.00782100  |
| H  | -3.66137200 | -0.10635300 | -0.91936600 |
| H  | -3.48349000 | -1.62487400 | 0.78813500  |
| H  | -6.25975600 | 0.09760600  | 3.14378900  |
| H  | -6.34997800 | 0.40126300  | 1.45403600  |
| H  | -3.54202400 | -2.20417900 | 2.83226700  |
| H  | -4.92053100 | -1.76875500 | 3.86828700  |
| H  | 1.18075100  | 1.56110700  | 4.09722300  |
| H  | -1.84994000 | 3.69821200  | -1.07934700 |
| H  | -0.82173800 | -1.90335400 | -3.95681300 |
| H  | 3.24578900  | -3.46468900 | 0.73366900  |
| H  | -1.42365900 | 5.76301900  | 2.04254300  |
| H  | -1.07026400 | 5.64169800  | 0.32017100  |
| H  | -2.57289500 | 4.97754700  | 0.96086500  |
| H  | -0.54927200 | 5.02440900  | 3.84005600  |
| H  | 0.99945800  | 4.22247500  | 4.11026300  |
| H  | -3.70193300 | 3.26498200  | -2.66107300 |
| H  | -2.33208700 | 3.84537700  | -3.60485200 |
| H  | -3.51116200 | 2.76447400  | -4.34204600 |
| H  | -1.90892400 | 0.01012200  | -5.68945700 |
| H  | 0.94170300  | -3.36096700 | -4.88635300 |
| H  | 1.47620400  | -4.87907000 | -4.16219200 |
| H  | -0.21208200 | -4.39075900 | -4.03835700 |
| H  | 3.44630100  | -4.88322500 | -2.90393500 |
| H  | 4.17734900  | -2.81944400 | 4.38330700  |
| H  | 4.73369700  | -3.00197800 | 2.71988800  |
| H  | 3.35680100  | -3.94202500 | 3.29735000  |
| H  | 1.77155200  | -0.43781800 | 5.71241400  |
| H  | 3.38071400  | -1.16195500 | 5.60061000  |
| Cl | -0.92412700 | -2.34187800 | 1.90422700  |
| O  | -1.03345000 | -0.75711400 | 0.51001900  |
| O  | -2.40613400 | -2.96799500 | 1.79394200  |
| H  | 5.60720400  | 5.10289300  | -2.40946200 |
| H  | 3.85892100  | 4.87861700  | -2.59764900 |
| H  | -0.49103900 | 3.47610300  | 4.68462100  |
| H  | -3.14871200 | -0.83945900 | -4.76930700 |
| H  | -3.38701600 | 0.85206000  | -5.22040000 |

|   |             |             |             |
|---|-------------|-------------|-------------|
| H | 3.80343300  | -4.82462000 | -1.17673400 |
| H | 2.45541700  | -5.80494100 | -1.76188900 |
| H | 3.15692800  | 0.55068500  | 5.22737100  |
| H | 4.10578100  | 1.47442100  | -3.24764700 |
| H | -5.52991400 | -1.67973800 | -1.54861300 |

### Int1<sub>II,01</sub>

|                                           |              |
|-------------------------------------------|--------------|
| Energy with the small basis set:          | -2626.233099 |
| Solution energy with the small basis set: | -2626.233049 |
| Energy with larger basis sets:            | -2626.910297 |
| Zero-point energy:                        | 0.775469     |
| Dispersion effect:                        | -0.179381661 |

|    |             |             |             |
|----|-------------|-------------|-------------|
| C  | 83.56100000 | 29.40899998 | 40.48999993 |
| C  | 84.50950823 | 28.51784128 | 39.66532281 |
| C  | 84.34131729 | 28.67573823 | 38.18562756 |
| N  | 84.55023139 | 29.87820309 | 37.52786132 |
| C  | 83.95579882 | 27.80769441 | 37.19541608 |
| C  | 84.29279415 | 29.69950062 | 36.20863444 |
| N  | 83.92914746 | 28.45194838 | 35.97341057 |
| C  | 78.74700006 | 28.42299995 | 29.79600009 |
| C  | 79.64624574 | 28.13413160 | 31.00698814 |
| N  | 79.84843850 | 26.70787473 | 31.29410696 |
| C  | 78.98808478 | 25.94282383 | 31.95816837 |
| N  | 77.74933661 | 26.40589059 | 32.26299074 |
| N  | 79.35360668 | 24.72424084 | 32.37196178 |
| Fe | 83.32385295 | 27.66953960 | 34.00639981 |
| C  | 83.68239945 | 24.39432990 | 34.98132771 |
| C  | 80.15840635 | 27.69266921 | 35.28655438 |
| C  | 82.85719860 | 30.83407477 | 32.80623161 |
| C  | 86.64761126 | 27.84575550 | 33.28246319 |
| N  | 82.17215582 | 26.32238108 | 35.00004606 |
| C  | 82.47061691 | 25.00627965 | 35.26811920 |
| C  | 81.33909742 | 24.34812823 | 35.92790910 |
| C  | 80.36959211 | 25.30445735 | 36.05409008 |
| C  | 80.89869462 | 26.52321415 | 35.44718382 |
| C  | 79.00789030 | 25.18855758 | 36.66938504 |
| C  | 81.28899999 | 22.90700015 | 36.36999992 |
| N  | 81.80030330 | 29.02559932 | 34.04966645 |
| C  | 80.56150435 | 28.82296210 | 34.58645591 |
| C  | 79.67602144 | 29.94115047 | 34.26283991 |
| C  | 80.39637772 | 30.80770238 | 33.48578034 |
| C  | 81.74937246 | 30.22709094 | 33.39091732 |

|   |             |             |             |
|---|-------------|-------------|-------------|
| C | 78.24841038 | 30.03868685 | 34.71456984 |
| C | 79.89800004 | 32.07999990 | 32.83400003 |
| N | 84.55361689 | 29.09878319 | 33.24368595 |
| C | 84.16417517 | 30.33187824 | 32.79879273 |
| C | 85.32763697 | 31.09218955 | 32.35260052 |
| C | 86.43322812 | 30.30266725 | 32.53193029 |
| C | 85.91769071 | 29.01619880 | 33.05895507 |
| C | 85.29588393 | 32.48531858 | 31.79895236 |
| C | 87.85999994 | 30.75899997 | 32.22300003 |
| N | 84.86128597 | 26.35983186 | 34.10111439 |
| C | 86.14632595 | 26.60496296 | 33.71087359 |
| C | 86.94072179 | 25.36495583 | 33.80091895 |
| C | 86.10095517 | 24.37266828 | 34.24048496 |
| C | 84.79974473 | 25.02658352 | 34.43430191 |
| C | 88.39473918 | 25.27498318 | 33.44873112 |
| C | 86.39099997 | 22.89700005 | 34.52599999 |
| H | 85.55006422 | 28.72886322 | 39.94834425 |
| H | 84.33643146 | 27.46516790 | 39.91113813 |
| H | 83.69597710 | 26.76465401 | 37.28218383 |
| H | 84.37793143 | 30.48176370 | 35.47142498 |
| H | 83.73055024 | 30.47367532 | 40.29397055 |
| H | 78.68921783 | 29.50378952 | 29.63489911 |
| H | 77.72104736 | 28.05601516 | 29.91825287 |
| H | 79.26172583 | 28.62654426 | 31.90668858 |
| H | 80.64431412 | 28.54259366 | 30.83849275 |
| H | 80.78374569 | 26.29918211 | 31.15964173 |
| H | 77.08067053 | 25.78752671 | 32.69384130 |
| H | 77.37414087 | 27.19136493 | 31.75700493 |
| H | 80.30693495 | 24.39565477 | 32.13091846 |
| H | 78.65833206 | 24.06219927 | 32.67708830 |
| H | 83.77982570 | 23.34255454 | 35.22653570 |
| H | 79.15104994 | 27.69480439 | 35.68742781 |
| H | 82.70446931 | 31.80967381 | 32.35785520 |
| H | 87.70823247 | 27.88468024 | 33.05820065 |
| H | 78.82377120 | 24.18286708 | 37.05434977 |
| H | 78.88320879 | 25.88690095 | 37.50515127 |
| H | 78.21632458 | 25.41456031 | 35.94389390 |
| H | 80.32233064 | 22.66241660 | 36.81547250 |
| H | 82.06164216 | 22.68606837 | 37.11605354 |
| H | 77.65444314 | 29.18326047 | 34.36852097 |
| H | 78.17429308 | 30.05492002 | 35.80862782 |
| H | 77.76707028 | 30.94598323 | 34.34275839 |
| H | 80.46417871 | 32.95801660 | 33.16726903 |
| H | 84.48101088 | 33.08105093 | 32.21999944 |



|    |             |             |             |
|----|-------------|-------------|-------------|
| H  | 86.23042861 | 33.01435004 | 32.00733520 |
| H  | 85.16708412 | 32.47940602 | 30.70914900 |
| H  | 88.05498386 | 31.73196449 | 32.68472997 |
| H  | 88.77952029 | 24.26358991 | 33.59854353 |
| H  | 89.00131200 | 25.95190727 | 34.06265920 |
| H  | 88.57164080 | 25.54359650 | 32.40020312 |
| H  | 85.72677734 | 22.24549954 | 33.94782087 |
| H  | 87.42065701 | 22.64487072 | 34.26417569 |
| Cl | 83.30684799 | 24.26298874 | 31.43406724 |
| O  | 82.84626621 | 27.15635244 | 32.54015599 |
| O  | 81.72798043 | 24.63386715 | 31.19714998 |
| H  | 83.71445236 | 29.24554404 | 41.56080669 |
| H  | 82.51512999 | 29.18877341 | 40.25608614 |
| H  | 81.45112007 | 22.22281307 | 35.52838014 |
| H  | 79.99528782 | 32.03184768 | 31.74318960 |
| H  | 78.84739158 | 32.25506463 | 33.07095256 |
| H  | 88.60688810 | 30.05565052 | 32.60043449 |
| H  | 88.01481999 | 30.86415410 | 31.14367153 |
| H  | 86.24637830 | 22.66474482 | 35.58718586 |
| H  | 84.84911628 | 30.74301971 | 37.95411468 |
| H  | 79.15098390 | 27.96322886 | 28.88958097 |

### Int1<sub>IV,21</sub>

|                                           |              |
|-------------------------------------------|--------------|
| Energy with the small basis set:          | -2626.247078 |
| Solution energy with the small basis set: | -2626.247044 |
| Energy with larger basis sets:            | -2626.924673 |
| Zero-point energy:                        | 0.775159     |
| Dispersion effect:                        | -0.178091669 |

|    |             |             |             |
|----|-------------|-------------|-------------|
| C  | 83.56100000 | 29.40899998 | 40.48999995 |
| C  | 84.40437337 | 28.39368561 | 39.69507799 |
| C  | 84.32443349 | 28.57450957 | 38.21036091 |
| N  | 84.80133637 | 29.69869828 | 37.55451494 |
| C  | 83.80219558 | 27.79315481 | 37.21123130 |
| C  | 84.55885646 | 29.55987849 | 36.22663167 |
| N  | 83.95216262 | 28.41156982 | 35.98469597 |
| C  | 78.74700005 | 28.42299994 | 29.79600009 |
| C  | 79.57894484 | 28.07862154 | 31.04184273 |
| N  | 79.86113102 | 26.64818352 | 31.21780594 |
| C  | 79.00535644 | 25.76814898 | 31.72922993 |
| N  | 77.71959142 | 26.11719161 | 31.96750492 |
| N  | 79.41799720 | 24.53435282 | 32.04921724 |
| Fe | 83.31789155 | 27.67000741 | 33.99614182 |

|   |             |             |             |
|---|-------------|-------------|-------------|
| C | 83.67572772 | 24.38996565 | 34.96608452 |
| C | 80.14282881 | 27.67828012 | 35.24731399 |
| C | 82.85930025 | 30.84598361 | 32.81590018 |
| C | 86.64119776 | 27.83988212 | 33.26653420 |
| N | 82.16145058 | 26.31484807 | 34.97421844 |
| C | 82.46396712 | 24.99986496 | 35.25007928 |
| C | 81.33340642 | 24.34272957 | 35.91178902 |
| C | 80.35772339 | 25.29452865 | 36.02411632 |
| C | 80.88516422 | 26.51101703 | 35.41258178 |
| C | 78.99233385 | 25.17725791 | 36.63141707 |
| C | 81.28899999 | 22.90700013 | 36.36999993 |
| N | 81.80127213 | 29.02970389 | 34.05279240 |
| C | 80.55414600 | 28.81558659 | 34.56586929 |
| C | 79.66775428 | 29.92956013 | 34.23581246 |
| C | 80.39458109 | 30.80325260 | 33.47423902 |
| C | 81.75176095 | 30.23263533 | 33.39663090 |
| C | 78.23508065 | 30.02375675 | 34.67084618 |
| C | 79.89800003 | 32.07999994 | 32.83400002 |
| N | 84.55118565 | 29.10461248 | 33.24378753 |
| C | 84.16546249 | 30.34432726 | 32.80749040 |
| C | 85.33265878 | 31.09985659 | 32.36208790 |
| C | 86.43415945 | 30.30135070 | 32.53348560 |
| C | 85.91369214 | 29.01544250 | 33.05177388 |
| C | 85.33024607 | 32.49880879 | 31.81953800 |
| C | 87.85999996 | 30.75899997 | 32.22300003 |
| N | 84.85405456 | 26.35359737 | 34.08215087 |
| C | 86.14058068 | 26.59957481 | 33.69144644 |
| C | 86.93606209 | 25.36098456 | 33.78502961 |
| C | 86.09752180 | 24.37003563 | 34.22933529 |
| C | 84.79412008 | 25.02374566 | 34.41841921 |
| C | 88.39085734 | 25.27138774 | 33.43535377 |
| C | 86.39099996 | 22.89700005 | 34.52599999 |
| H | 85.45180262 | 28.45035615 | 40.02200775 |
| H | 84.07045546 | 27.37658175 | 39.92473696 |
| H | 83.32954296 | 26.82805395 | 37.29607094 |
| H | 84.83637445 | 30.29560127 | 35.48905781 |
| H | 83.89156988 | 30.43840261 | 40.31192917 |
| H | 78.61426409 | 29.50741926 | 29.73659772 |
| H | 77.74973584 | 27.96833899 | 29.80132601 |
| H | 79.09874925 | 28.45939809 | 31.94956251 |
| H | 80.55470080 | 28.56458197 | 30.98903112 |
| H | 80.82803758 | 26.31289042 | 31.10798750 |
| H | 77.07771246 | 25.45546180 | 32.37175880 |
| H | 77.33906537 | 26.96999416 | 31.59409233 |

|    |             |             |             |
|----|-------------|-------------|-------------|
| H  | 80.40088303 | 24.28623435 | 31.82808995 |
| H  | 78.74008971 | 23.79860140 | 32.17197869 |
| H  | 83.77579932 | 23.33956523 | 35.21608522 |
| H  | 79.13040166 | 27.67481297 | 35.63521643 |
| H  | 82.70252138 | 31.82215162 | 32.37134242 |
| H  | 87.70119890 | 27.87844711 | 33.03913122 |
| H  | 78.81634718 | 24.17849037 | 37.03737644 |
| H  | 78.85305772 | 25.89269754 | 37.45023477 |
| H  | 78.20427945 | 25.37632828 | 35.89452072 |
| H  | 80.33366559 | 22.67185194 | 36.84392935 |
| H  | 82.08077256 | 22.69030276 | 37.09688968 |
| H  | 77.66430158 | 29.12905462 | 34.39304852 |
| H  | 78.15344964 | 30.12597131 | 35.75996856 |
| H  | 77.73332252 | 30.88629768 | 34.22626456 |
| H  | 80.32597582 | 32.96976899 | 33.31208500 |
| H  | 84.38529969 | 33.01809127 | 31.99507106 |
| H  | 86.12335025 | 33.10083699 | 32.27734927 |
| H  | 85.51233235 | 32.50560065 | 30.73736124 |
| H  | 88.08385652 | 31.68909901 | 32.75625975 |
| H  | 88.77604274 | 24.26056464 | 33.58805876 |
| H  | 88.99625089 | 25.94991871 | 34.04868965 |
| H  | 88.56923024 | 25.53770512 | 32.38651278 |
| H  | 85.72860224 | 22.23908297 | 33.95301875 |
| H  | 87.42142720 | 22.64566724 | 34.26648164 |
| Cl | 83.43071096 | 24.32767082 | 31.41455681 |
| O  | 82.82983648 | 27.17748049 | 32.52733551 |
| O  | 81.87413697 | 24.69543869 | 31.05653971 |
| H  | 83.64281741 | 29.21878910 | 41.56435468 |
| H  | 82.50535540 | 29.34461494 | 40.20977176 |
| H  | 81.42478123 | 22.21290380 | 35.53167623 |
| H  | 80.16699660 | 32.12486480 | 31.77293283 |
| H  | 78.81196779 | 32.15698469 | 32.90880408 |
| H  | 88.60675884 | 30.01689280 | 32.51670743 |
| H  | 87.98286109 | 30.95293739 | 31.15175277 |
| H  | 86.24647459 | 22.67344496 | 35.58906060 |
| H  | 85.26095029 | 30.48702276 | 37.98626018 |
| H  | 79.25162067 | 28.08931338 | 28.88481133 |

## React<sub>IV</sub>

|                                           |              |
|-------------------------------------------|--------------|
| Energy with the small basis set:          | -2626.246978 |
| Solution energy with the small basis set: | -2626.247025 |
| Energy with larger basis sets:            | -2626.93359  |
| Zero-point energy:                        | 0.776997     |
| Dispersion effect:                        | -0.174537618 |

|    |             |             |             |
|----|-------------|-------------|-------------|
| C  | 83.56100000 | 29.40899998 | 40.48999996 |
| C  | 84.33025896 | 28.29692659 | 39.75510321 |
| C  | 84.32678305 | 28.46981102 | 38.26935942 |
| N  | 84.99437195 | 29.49947001 | 37.62417572 |
| C  | 83.69515466 | 27.78696538 | 37.26183920 |
| C  | 84.75106246 | 29.40210982 | 36.29252475 |
| N  | 83.96467197 | 28.37219717 | 36.04075943 |
| C  | 78.74700004 | 28.42299994 | 29.79600007 |
| C  | 79.15304251 | 27.82392731 | 31.14329450 |
| N  | 79.54133899 | 26.41631614 | 31.06026250 |
| C  | 78.78430645 | 25.36806375 | 31.34566533 |
| N  | 77.44151793 | 25.47730486 | 31.46382029 |
| N  | 79.37559694 | 24.18058594 | 31.56769301 |
| Fe | 83.32197762 | 27.63856050 | 33.94176553 |
| C  | 83.68824646 | 24.35984591 | 34.93319698 |
| C  | 80.10418956 | 27.60565193 | 35.08491031 |
| C  | 82.86537453 | 30.83774888 | 32.78332353 |
| C  | 86.64539295 | 27.81278271 | 33.20230905 |
| N  | 82.14121353 | 26.25715724 | 34.84617920 |
| C  | 82.45952919 | 24.95803338 | 35.18129686 |
| C  | 81.33652530 | 24.31926557 | 35.85323423 |
| C  | 80.34203231 | 25.26265771 | 35.92115630 |
| C  | 80.85104318 | 26.45462242 | 35.27611235 |
| C  | 78.97319971 | 25.14120652 | 36.52116061 |
| C  | 81.28899999 | 22.90700009 | 36.36999995 |
| N  | 81.77710703 | 28.95632921 | 33.89856133 |
| C  | 80.52215024 | 28.74430927 | 34.40900293 |
| C  | 79.65722038 | 29.86508645 | 34.11430843 |
| C  | 80.40095306 | 30.76854746 | 33.39370626 |
| C  | 81.74465879 | 30.20021658 | 33.30090952 |
| C  | 78.22462379 | 29.97843441 | 34.54513154 |
| C  | 79.89800002 | 32.07999997 | 32.83400001 |
| N  | 84.55221258 | 29.07992495 | 33.19161124 |
| C  | 84.17127798 | 30.33946191 | 32.78890359 |
| C  | 85.33517068 | 31.09469308 | 32.37755281 |
| C  | 86.43891691 | 30.28232055 | 32.52650583 |

|   |             |             |             |
|---|-------------|-------------|-------------|
| C | 85.92197782 | 28.99554188 | 33.00614343 |
| C | 85.35574840 | 32.50974664 | 31.87924469 |
| C | 87.85999997 | 30.75899998 | 32.22300002 |
| N | 84.84262867 | 26.31722373 | 33.99161561 |
| C | 86.14600563 | 26.57323545 | 33.61922278 |
| C | 86.93705355 | 25.35298752 | 33.74931791 |
| C | 86.09725799 | 24.36333523 | 34.21794171 |
| C | 84.79935313 | 24.99604124 | 34.38686737 |
| C | 88.39505573 | 25.25106622 | 33.41160745 |
| C | 86.39099997 | 22.89700004 | 34.52599999 |
| H | 85.36274738 | 28.24990678 | 40.12721010 |
| H | 83.88142087 | 27.32430421 | 39.98149687 |
| H | 83.06665360 | 26.91347594 | 37.33725888 |
| H | 85.15953138 | 30.07819280 | 35.55822072 |
| H | 84.00386455 | 30.39458795 | 40.30845589 |
| H | 78.49992004 | 29.48210997 | 29.91788328 |
| H | 77.87388604 | 27.91981135 | 29.36487856 |
| H | 78.34861464 | 27.92320654 | 31.88009747 |
| H | 80.01903053 | 28.35282846 | 31.54731986 |
| H | 80.52801638 | 26.17451521 | 30.86544941 |
| H | 76.89395240 | 24.70244330 | 31.80113684 |
| H | 76.95454585 | 26.27287270 | 31.08557604 |
| H | 80.40692326 | 24.17702607 | 31.47976549 |
| H | 78.86646321 | 23.33060877 | 31.37742061 |
| H | 83.80484547 | 23.32251425 | 35.22471422 |
| H | 79.09236492 | 27.60521046 | 35.47174976 |
| H | 82.71871542 | 31.83297902 | 32.38007832 |
| H | 87.70757134 | 27.85357078 | 32.98548221 |
| H | 78.82125890 | 24.16401071 | 36.98467244 |
| H | 78.80457027 | 25.89964347 | 37.29408892 |
| H | 78.18892514 | 25.27052882 | 35.76553161 |
| H | 80.34524704 | 22.70305712 | 36.87966851 |
| H | 82.09829424 | 22.70863662 | 37.08266357 |
| H | 77.67791481 | 29.03897268 | 34.40794268 |
| H | 78.14374919 | 30.24343153 | 35.60684511 |
| H | 77.69663751 | 30.75134089 | 33.98114134 |
| H | 80.12009088 | 32.92070046 | 33.50303297 |
| H | 84.37181294 | 32.98256891 | 31.90285254 |
| H | 86.03108494 | 33.13150069 | 32.47933639 |
| H | 85.71795957 | 32.55733654 | 30.84520483 |
| H | 88.12271420 | 31.60891571 | 32.86260096 |
| H | 88.77537108 | 24.24274295 | 33.59064183 |
| H | 88.99841243 | 25.94050751 | 34.01431983 |
| H | 88.58339354 | 25.49200277 | 32.35858859 |

|    |             |             |             |
|----|-------------|-------------|-------------|
| H  | 85.73966947 | 22.23452125 | 33.94561696 |
| H  | 87.42548146 | 22.64480959 | 34.28333452 |
| Cl | 83.15277284 | 25.67179839 | 31.32886731 |
| O  | 82.74785928 | 27.11447544 | 31.98452729 |
| O  | 81.84285975 | 24.94813692 | 30.73425383 |
| H  | 83.57124019 | 29.23759367 | 41.57079165 |
| H  | 82.51893496 | 29.44583909 | 40.15872478 |
| H  | 81.39162619 | 22.17603470 | 35.55847618 |
| H  | 80.35566625 | 32.30612126 | 31.86581977 |
| H  | 78.81518087 | 32.05245831 | 32.69234394 |
| H  | 88.60552725 | 29.97606641 | 32.38377154 |
| H  | 87.94065854 | 31.09151473 | 31.18242822 |
| H  | 86.23242618 | 22.67517418 | 35.58730235 |
| H  | 85.57204265 | 30.19967188 | 38.06621626 |
| H  | 79.56517213 | 28.34571016 | 29.07415414 |

### TS1<sub>IV,41</sub>

|                                           |                       |
|-------------------------------------------|-----------------------|
| Energy with the small basis set:          | -2626.212532          |
| Solution energy with the small basis set: | -2626.212753          |
| Energy with larger basis sets:            | -2626.89373           |
| Zero-point energy:                        | 0.775994              |
| Dispersion effect:                        | -0.175620931          |
| Imaginary frequency:                      | -407 cm <sup>-1</sup> |

|    |             |             |             |
|----|-------------|-------------|-------------|
| C  | 4.38916900  | 0.41708100  | 5.35565600  |
| C  | 4.45823800  | -0.35061400 | 4.02143400  |
| C  | 3.50773500  | 0.13948200  | 2.97024500  |
| N  | 3.45352500  | 1.46247600  | 2.55602100  |
| C  | 2.56739400  | -0.50025900 | 2.20232100  |
| C  | 2.51680500  | 1.57974000  | 1.58636400  |
| N  | 1.96169900  | 0.40337600  | 1.34781100  |
| C  | -5.61812400 | 1.66523700  | -0.71102600 |
| C  | -4.55362400 | 0.60858900  | -0.39442200 |
| N  | -4.17484600 | -0.20725200 | -1.55156700 |
| C  | -4.79714600 | -1.30630100 | -1.97097700 |
| N  | -5.98608700 | -1.67654000 | -1.44650400 |
| N  | -4.22848100 | -2.05907200 | -2.92062400 |
| Fe | 0.39494900  | 0.06737800  | -0.03581500 |
| C  | 0.88049000  | -3.33377300 | -0.00602200 |
| C  | -1.63295000 | -0.22587600 | 2.73463800  |
| C  | -0.28183800 | 3.42382300  | -0.16659600 |
| C  | 2.78172700  | 0.42629100  | -2.47124500 |

|   |             |             |             |
|---|-------------|-------------|-------------|
| N | -0.19544200 | -1.50151100 | 1.21319800  |
| C | 0.07621700  | -2.82462700 | 1.02192200  |
| C | -0.59083000 | -3.60877900 | 2.05364600  |
| C | -1.27346200 | -2.72340200 | 2.84783300  |
| C | -1.03290700 | -1.40305400 | 2.28857800  |
| C | -2.11997900 | -3.00102200 | 4.05344800  |
| C | -0.51195600 | -5.09092600 | 2.18497400  |
| N | -0.75212900 | 1.38275700  | 1.09896700  |
| C | -1.54502900 | 1.04248100  | 2.15735800  |
| C | -2.33010600 | 2.19564500  | 2.56894600  |
| C | -2.00122800 | 3.22340400  | 1.72040700  |
| C | -0.98381400 | 2.70027800  | 0.80531500  |
| C | -3.29454400 | 2.19572700  | 3.71758700  |
| C | -2.56682500 | 4.61206000  | 1.72489100  |
| N | 1.17989700  | 1.67748200  | -1.11556400 |
| C | 0.73857200  | 2.96795900  | -1.01848700 |
| C | 1.52924500  | 3.81095100  | -1.90254400 |
| C | 2.45115500  | 3.00284600  | -2.52857600 |
| C | 2.18860300  | 1.63272000  | -2.04444600 |
| C | 1.32708500  | 5.28909600  | -2.05888900 |
| C | 3.50851500  | 3.48320400  | -3.50270300 |
| N | 1.57684800  | -1.23920600 | -1.09188600 |
| C | 2.47973900  | -0.89302900 | -2.07188100 |
| C | 3.04630700  | -2.12244300 | -2.63704200 |
| C | 2.47453900  | -3.19259100 | -1.97629300 |
| C | 1.57900000  | -2.61331900 | -0.98013300 |
| C | 4.05391100  | -2.14923000 | -3.74750600 |
| C | 2.67222100  | -4.69286700 | -2.18920100 |
| H | 5.48556000  | -0.31125500 | 3.63389400  |
| H | 4.24119600  | -1.40946500 | 4.19285900  |
| H | 2.28667000  | -1.54073900 | 2.20676200  |
| H | 2.26727900  | 2.50557900  | 1.09469100  |
| H | 4.65421400  | 1.47332900  | 5.23414500  |
| H | -5.83206700 | 2.25538600  | 0.18482300  |
| H | -6.55752500 | 1.21992500  | -1.05522300 |
| H | -4.88042300 | -0.05533300 | 0.41537300  |
| H | -3.63448200 | 1.08248500  | -0.04404400 |
| H | -3.30799400 | 0.01749400  | -2.04311200 |
| H | -6.33008400 | -2.61188900 | -1.59303100 |
| H | -6.41750700 | -1.13471100 | -0.71652000 |
| H | -3.34659400 | -1.69253700 | -3.33087000 |
| H | -4.78820400 | -2.71965900 | -3.43691100 |
| H | 0.99943400  | -4.41197600 | -0.03412300 |
| H | -2.29015400 | -0.31769600 | 3.59308700  |

|    |             |             |             |
|----|-------------|-------------|-------------|
| H  | -0.53326600 | 4.47636600  | -0.25066100 |
| H  | 3.54279400  | 0.51953900  | -3.24016400 |
| H  | -2.12803200 | -4.06423200 | 4.30347400  |
| H  | -1.75518000 | -2.46070600 | 4.93473900  |
| H  | -3.16154900 | -2.69444100 | 3.89760100  |
| H  | -1.10122400 | -5.45323400 | 3.03025900  |
| H  | 0.51934800  | -5.43188300 | 2.33748900  |
| H  | -4.06592900 | 1.42495200  | 3.60220000  |
| H  | -2.78496100 | 1.99642000  | 4.66780900  |
| H  | -3.80382800 | 3.15635400  | 3.81914500  |
| H  | -1.80718200 | 5.36155500  | 1.97957500  |
| H  | 1.35439000  | 5.80770100  | -1.09366100 |
| H  | 2.09231200  | 5.73846800  | -2.69453500 |
| H  | 0.35554200  | 5.51195900  | -2.51658100 |
| H  | 3.68680600  | 4.55361900  | -3.38674900 |
| H  | 4.35665000  | -3.17058700 | -3.98857100 |
| H  | 4.96019300  | -1.59309100 | -3.48082200 |
| H  | 3.65726000  | -1.69829100 | -4.66479800 |
| H  | 1.72949000  | -5.17600600 | -2.46750700 |
| H  | 3.39542300  | -4.88624400 | -2.98394000 |
| Cl | -0.69837900 | -0.89592400 | -2.89967900 |
| O  | -0.97519100 | -0.07600000 | -1.02042500 |
| O  | -2.09543100 | -0.52585300 | -3.59638500 |
| H  | 5.09148400  | -0.01132200 | 6.07577500  |
| H  | 3.38479000  | 0.37053400  | 5.78659300  |
| H  | -0.88419100 | -5.59951100 | 1.28718500  |
| H  | -2.96794700 | 4.88967700  | 0.74306100  |
| H  | -3.37571200 | 4.71151100  | 2.45137200  |
| H  | 4.46243300  | 2.96876100  | -3.34573900 |
| H  | 3.21345600  | 3.30622900  | -4.54426700 |
| H  | 3.03906300  | -5.17811800 | -1.27822600 |
| H  | 4.01560400  | 2.21932600  | 2.91629900  |
| H  | -5.26730700 | 2.34487600  | -1.49236300 |

### Int1<sub>IV,41</sub>

|                                           |              |
|-------------------------------------------|--------------|
| Energy with the small basis set:          | -2626.224388 |
| Solution energy with the small basis set: | -2626.224408 |
| Energy with larger basis sets:            | -2626.906635 |
| Zero-point energy:                        | 0.773791     |
| Dispersion effect:                        | -0.176564462 |

|   |             |             |             |
|---|-------------|-------------|-------------|
| C | 83.56100000 | 29.40899998 | 40.48999995 |
| C | 84.47967796 | 28.44084519 | 39.72114692 |



|    |             |             |             |
|----|-------------|-------------|-------------|
| C  | 84.39948202 | 28.60734310 | 38.23586934 |
| N  | 84.86235942 | 29.73379041 | 37.57420014 |
| C  | 83.86626206 | 27.82353237 | 37.24521699 |
| C  | 84.60299262 | 29.59553085 | 36.25044163 |
| N  | 83.99679846 | 28.44453516 | 36.01828571 |
| C  | 78.74700001 | 28.42299994 | 29.79600008 |
| C  | 79.52749654 | 28.09906707 | 31.07946466 |
| N  | 79.71433598 | 26.66581054 | 31.32868660 |
| C  | 78.80102531 | 25.86392916 | 31.86221031 |
| N  | 77.54382584 | 26.30846570 | 32.10064104 |
| N  | 79.13304893 | 24.61334156 | 32.21967248 |
| Fe | 83.30922305 | 27.70193938 | 34.04096833 |
| C  | 83.69110136 | 24.42585401 | 35.05731901 |
| C  | 80.11179388 | 27.69184157 | 35.29911952 |
| C  | 82.86263752 | 30.90114035 | 32.92716798 |
| C  | 86.64064610 | 27.85292388 | 33.25648135 |
| N  | 82.14564492 | 26.33216463 | 35.10286181 |
| C  | 82.46510532 | 25.02191577 | 35.34874244 |
| C  | 81.31794839 | 24.34655969 | 35.96138988 |
| C  | 80.32210405 | 25.27981198 | 36.05815705 |
| C  | 80.85421024 | 26.51769329 | 35.48726095 |
| C  | 78.93716834 | 25.12338877 | 36.60770176 |
| C  | 81.28900000 | 22.90700019 | 36.36999990 |
| N  | 81.77138985 | 29.10593479 | 34.17731384 |
| C  | 80.51411735 | 28.85466408 | 34.64144562 |
| C  | 79.62268644 | 29.95549767 | 34.26710492 |
| C  | 80.37008469 | 30.83423805 | 33.52911009 |
| C  | 81.73937743 | 30.29081154 | 33.50260380 |
| C  | 78.17034190 | 30.03098476 | 34.63431999 |
| C  | 79.89800007 | 32.07999987 | 32.83400003 |
| N  | 84.57495978 | 29.16778780 | 33.28088530 |
| C  | 84.17778517 | 30.40996732 | 32.87557739 |
| C  | 85.34639316 | 31.15900306 | 32.41345394 |
| C  | 86.43864607 | 30.33828216 | 32.54702428 |
| C  | 85.92260130 | 29.04966924 | 33.06135143 |
| C  | 85.34822387 | 32.56724001 | 31.89697957 |
| C  | 87.85999996 | 30.75899997 | 32.22300003 |
| N  | 84.89874200 | 26.35668066 | 34.14628633 |
| C  | 86.16432261 | 26.60310487 | 33.70376069 |
| C  | 86.94939912 | 25.34985801 | 33.77190036 |
| C  | 86.11358071 | 24.37030638 | 34.24957574 |
| C  | 84.82162384 | 25.03646055 | 34.48720778 |
| C  | 88.38685310 | 25.23811769 | 33.36407756 |
| C  | 86.39099996 | 22.89700006 | 34.52600000 |

|    |             |             |             |
|----|-------------|-------------|-------------|
| H  | 85.51743711 | 28.56982337 | 40.05748588 |
| H  | 84.20967169 | 27.40682988 | 39.95871170 |
| H  | 83.39671707 | 26.85771058 | 37.33496914 |
| H  | 84.86802023 | 30.33190852 | 35.50949766 |
| H  | 83.82083845 | 30.45502107 | 40.29308027 |
| H  | 78.68015112 | 29.50807904 | 29.67158590 |
| H  | 77.72491695 | 28.02708539 | 29.80118596 |
| H  | 79.05073679 | 28.55372026 | 31.95482334 |
| H  | 80.53280943 | 28.52156041 | 31.02783806 |
| H  | 80.64638870 | 26.23862247 | 31.19256570 |
| H  | 76.85817925 | 25.69411478 | 32.50853275 |
| H  | 77.21100267 | 27.15587433 | 31.67232191 |
| H  | 80.09749827 | 24.30398319 | 31.99570593 |
| H  | 78.40885226 | 23.91938717 | 32.32251072 |
| H  | 83.78570092 | 23.37296388 | 35.29940300 |
| H  | 79.08414951 | 27.66673564 | 35.64530168 |
| H  | 82.70015791 | 31.87983694 | 32.48778879 |
| H  | 87.69236371 | 27.88571100 | 32.98993336 |
| H  | 78.78173838 | 24.12896724 | 37.03275218 |
| H  | 78.73307879 | 25.85412305 | 37.39876728 |
| H  | 78.17770210 | 25.27147170 | 35.82964040 |
| H  | 80.33590070 | 22.63790811 | 36.83133997 |
| H  | 82.08036834 | 22.67420382 | 37.09275411 |
| H  | 77.62505385 | 29.13104168 | 34.32299792 |
| H  | 78.03596954 | 30.12260056 | 35.71914513 |
| H  | 77.67985642 | 30.89132290 | 34.17285722 |
| H  | 80.35536133 | 32.98371458 | 33.25587727 |
| H  | 84.44038425 | 33.11241065 | 32.16736544 |
| H  | 86.19948014 | 33.13243487 | 32.29242890 |
| H  | 85.43201703 | 32.59149577 | 30.80292526 |
| H  | 88.10549609 | 31.70081950 | 32.72579667 |
| H  | 88.76686342 | 24.22413802 | 33.50891158 |
| H  | 89.02438818 | 25.91520695 | 33.94578674 |
| H  | 88.52421751 | 25.49451562 | 32.30652532 |
| H  | 85.71258713 | 22.25374219 | 33.95453152 |
| H  | 87.41427598 | 22.63092366 | 34.25236229 |
| Cl | 83.15544154 | 24.33573067 | 31.50625984 |
| O  | 82.78692251 | 27.20854557 | 32.58655097 |
| O  | 81.57555277 | 24.65756059 | 31.17428565 |
| H  | 83.64487686 | 29.24581663 | 41.56873954 |
| H  | 82.51542522 | 29.26530947 | 40.20166749 |
| H  | 81.43817301 | 22.24279886 | 35.50956927 |
| H  | 80.15513464 | 32.06107466 | 31.76866305 |
| H  | 78.81488691 | 32.19509909 | 32.91363902 |

|   |             |             |             |
|---|-------------|-------------|-------------|
| H | 88.59369318 | 30.01295111 | 32.53936372 |
| H | 87.99138643 | 30.91860733 | 31.14656667 |
| H | 86.25561725 | 22.66216282 | 35.58801667 |
| H | 85.32625380 | 30.52289316 | 38.00012205 |
| H | 79.25237376 | 28.00915194 | 28.91872300 |

## React<sub>VI</sub>

|                                           |              |
|-------------------------------------------|--------------|
| Energy with the small basis set:          | -2626.23897  |
| Solution energy with the small basis set: | -2626.238987 |
| Energy with larger basis sets:            | -2626.9315   |
| Zero-point energy:                        | 0.776136     |
| Dispersion effect:                        | -0.177378573 |

|    |             |             |             |
|----|-------------|-------------|-------------|
| C  | 83.56100000 | 29.40899997 | 40.48999995 |
| C  | 84.42427471 | 28.37615771 | 39.74348705 |
| C  | 84.37613070 | 28.54371957 | 38.25792179 |
| N  | 84.93097115 | 29.63097017 | 37.59982628 |
| C  | 83.78829020 | 27.80453316 | 37.26419433 |
| C  | 84.67040673 | 29.51253409 | 36.27440934 |
| N  | 83.97672194 | 28.41354748 | 36.03941569 |
| C  | 78.74700008 | 28.42299993 | 29.79600008 |
| C  | 79.31990821 | 28.02030830 | 31.15363783 |
| N  | 79.51921473 | 26.57694551 | 31.29124421 |
| C  | 78.71810557 | 25.72773116 | 31.91686312 |
| N  | 77.43633580 | 26.04969146 | 32.20363563 |
| N  | 79.20694044 | 24.53788247 | 32.30311849 |
| Fe | 83.32072575 | 27.66819268 | 33.98263614 |
| C  | 83.69749308 | 24.38659165 | 35.00246348 |
| C  | 80.08308059 | 27.62656148 | 35.15109935 |
| C  | 82.85792366 | 30.86941855 | 32.84719124 |
| C  | 86.65209249 | 27.83066503 | 33.22463951 |
| N  | 82.11898738 | 26.26766883 | 34.94106051 |
| C  | 82.45283333 | 24.97233967 | 35.25164275 |
| C  | 81.31876838 | 24.32036450 | 35.88830299 |
| C  | 80.31119907 | 25.25163408 | 35.95674251 |
| C  | 80.82332235 | 26.46217346 | 35.34634818 |
| C  | 78.93388094 | 25.09834045 | 36.52800574 |
| C  | 81.28899999 | 22.90700009 | 36.36999996 |
| N  | 81.74295781 | 29.01264725 | 33.98732559 |
| C  | 80.48995684 | 28.78597198 | 34.48896028 |
| C  | 79.62445497 | 29.90591272 | 34.17928169 |
| C  | 80.37764646 | 30.80127831 | 33.45474370 |
| C  | 81.72524542 | 30.24364777 | 33.37705986 |

|   |             |             |             |
|---|-------------|-------------|-------------|
| C | 78.18405081 | 30.00952642 | 34.58788404 |
| C | 79.89800001 | 32.07999999 | 32.83400001 |
| N | 84.56819789 | 29.12411380 | 33.20167408 |
| C | 84.17593622 | 30.38158777 | 32.81339823 |
| C | 85.34054390 | 31.13041624 | 32.38682847 |
| C | 86.44185820 | 30.30804481 | 32.52873423 |
| C | 85.93207868 | 29.02404134 | 33.01630407 |
| C | 85.36438332 | 32.54699645 | 31.89470903 |
| C | 87.85999995 | 30.75899997 | 32.22300002 |
| N | 84.88563963 | 26.31798906 | 34.05737228 |
| C | 86.17746445 | 26.57979406 | 33.66321111 |
| C | 86.96454180 | 25.35243901 | 33.78160051 |
| C | 86.12026339 | 24.36672285 | 34.25741635 |
| C | 84.82739585 | 25.00412406 | 34.45155431 |
| C | 88.41557602 | 25.23558625 | 33.42130206 |
| C | 86.39099997 | 22.89700005 | 34.52599998 |
| H | 85.46288613 | 28.43427875 | 40.09616203 |
| H | 84.07925483 | 27.36434014 | 39.97944654 |
| H | 83.24448958 | 26.87713205 | 37.34899103 |
| H | 84.99851458 | 30.22208069 | 35.53182585 |
| H | 83.89918953 | 30.43318288 | 40.29752476 |
| H | 78.64932206 | 29.51152128 | 29.73955492 |
| H | 77.75731641 | 27.98630649 | 29.61882361 |
| H | 78.68349220 | 28.36718819 | 31.97308726 |
| H | 80.30179607 | 28.47529281 | 31.30856118 |
| H | 80.43747304 | 26.17453381 | 31.04502056 |
| H | 76.87430052 | 25.44652204 | 32.78167028 |
| H | 76.98222923 | 26.81708488 | 31.73636916 |
| H | 80.20954663 | 24.38051282 | 32.11411619 |
| H | 78.58994610 | 23.74805182 | 32.41250703 |
| H | 83.80806911 | 23.34671850 | 35.28986582 |
| H | 79.06491966 | 27.61686393 | 35.52428394 |
| H | 82.70671677 | 31.86714563 | 32.44824631 |
| H | 87.71197859 | 27.87354931 | 32.99377117 |
| H | 78.76144617 | 24.08754072 | 36.90484350 |
| H | 78.76346917 | 25.79115295 | 37.36023615 |
| H | 78.16263209 | 25.30620041 | 35.77613316 |
| H | 80.30109203 | 22.62766869 | 36.74343219 |
| H | 82.00343485 | 22.74263867 | 37.18578544 |
| H | 77.61187098 | 29.11837059 | 34.30101803 |
| H | 78.08264625 | 30.11330305 | 35.67518169 |
| H | 77.69446770 | 30.87442628 | 34.13427117 |
| H | 80.32869996 | 32.96089785 | 33.32591226 |
| H | 84.36372411 | 32.94332644 | 31.70772643 |

|    |             |             |             |
|----|-------------|-------------|-------------|
| H  | 85.85160424 | 33.21578064 | 32.61589716 |
| H  | 85.92869312 | 32.62717897 | 30.95897679 |
| H  | 88.14146765 | 31.60736105 | 32.85716811 |
| H  | 88.79975964 | 24.23404485 | 33.62861983 |
| H  | 89.02948542 | 25.94623790 | 33.98753156 |
| H  | 88.58482336 | 25.43969196 | 32.35708506 |
| H  | 85.77871296 | 22.26177584 | 33.87641150 |
| H  | 87.43831650 | 22.64490867 | 34.34493871 |
| Cl | 83.03351231 | 25.56928995 | 31.54342001 |
| O  | 82.73379712 | 27.08571521 | 32.09521418 |
| O  | 81.66396717 | 24.84938502 | 31.12025249 |
| H  | 83.60833308 | 29.24402033 | 41.57076409 |
| H  | 82.51463552 | 29.33970424 | 40.17820917 |
| H  | 81.55067027 | 22.20035595 | 35.57290417 |
| H  | 80.17558211 | 32.13875508 | 31.77570540 |
| H  | 78.81221271 | 32.17083305 | 32.89907630 |
| H  | 88.59322197 | 29.96494144 | 32.38587390 |
| H  | 87.94933255 | 31.08692079 | 31.18105613 |
| H  | 86.15960696 | 22.63096762 | 35.56345296 |
| H  | 85.45011458 | 30.38229608 | 38.03038494 |
| H  | 79.40243657 | 28.09872553 | 28.98238486 |

### TS1<sub>VI,41</sub>

|                                           |              |
|-------------------------------------------|--------------|
| Energy with the small basis set:          | -2626.214773 |
| Solution energy with the small basis set: | -2626.21496  |
| Energy with larger basis sets:            | -2626.896512 |
| Zero-point energy:                        | 0.773349     |
| Dispersion effect:                        | -0.168020122 |

|    |             |             |             |
|----|-------------|-------------|-------------|
| C  | 6.30054500  | -2.25092600 | 2.77688000  |
| C  | 5.99790800  | -1.38589600 | 1.54050700  |
| C  | 4.61323300  | -0.81677600 | 1.52139700  |
| N  | 4.12501500  | 0.02034800  | 2.51218400  |
| C  | 3.56892700  | -0.94574400 | 0.63942600  |
| C  | 2.84531400  | 0.35434300  | 2.19771300  |
| N  | 2.47706400  | -0.21527900 | 1.06641200  |
| C  | -5.23426700 | -2.20676000 | 0.44137500  |
| C  | -4.39092200 | -1.59960900 | -0.68546700 |
| N  | -4.72450500 | -0.20517200 | -0.97427800 |
| C  | -5.62525200 | 0.22344400  | -1.85219300 |
| N  | -6.54228600 | -0.61192300 | -2.39471900 |
| N  | -5.61227100 | 1.51551600  | -2.20341300 |
| Fe | 0.34184400  | 0.05636100  | -0.05221200 |

|   |             |             |             |
|---|-------------|-------------|-------------|
| C | 1.96013200  | -0.41034500 | -3.03666700 |
| C | 0.02620500  | -3.36017300 | 0.28423000  |
| C | -1.05764400 | 0.47902600  | 3.03276200  |
| C | 1.28576300  | 3.39486300  | -0.07161500 |
| N | 0.91858500  | -1.60210200 | -1.16807100 |
| C | 1.54023900  | -1.58370600 | -2.37174500 |
| C | 1.71456100  | -2.95296600 | -2.85862200 |
| C | 1.17680700  | -3.78342200 | -1.91279500 |
| C | 0.67371500  | -2.92402300 | -0.85671800 |
| C | 1.09524200  | -5.27963800 | -1.90516200 |
| C | 2.37250400  | -3.34004300 | -4.13663700 |
| N | -0.38404700 | -1.22671900 | 1.40743900  |
| C | -0.49765700 | -2.56852100 | 1.32501300  |
| C | -1.26311900 | -3.08682800 | 2.44921200  |
| C | -1.61526400 | -2.00354400 | 3.20671400  |
| C | -1.03416000 | -0.82555800 | 2.56057700  |
| C | -1.57084900 | -4.53626300 | 2.67069400  |
| C | -2.43530100 | -2.01110500 | 4.44829400  |
| N | 0.18498900  | 1.69725100  | 1.29040700  |
| C | -0.45412000 | 1.64716300  | 2.47545300  |
| C | -0.41115100 | 2.95449900  | 3.12385400  |
| C | 0.28069900  | 3.79998000  | 2.28675000  |
| C | 0.63920600  | 2.98746600  | 1.10050600  |
| C | -1.01978700 | 3.25133500  | 4.46201600  |
| C | 0.61391000  | 5.25049900  | 2.58195600  |
| N | 1.44585500  | 1.28901300  | -1.34920300 |
| C | 1.62819800  | 2.62522900  | -1.22917700 |
| C | 2.23025700  | 3.14846100  | -2.46494800 |
| C | 2.39506000  | 2.07619600  | -3.31535500 |
| C | 1.91134500  | 0.90784800  | -2.58251700 |
| C | 2.56873400  | 4.58927300  | -2.70359300 |
| C | 2.93228000  | 2.02316400  | -4.73120200 |
| H | 6.73533500  | -0.57404000 | 1.47402500  |
| H | 6.12362000  | -1.98313100 | 0.63191400  |
| H | 3.53879100  | -1.51673800 | -0.27561000 |
| H | 2.23537400  | 1.00241200  | 2.80721100  |
| H | 6.22532300  | -1.67399200 | 3.70523700  |
| H | -4.92503000 | -3.23999300 | 0.62626900  |
| H | -6.30269500 | -2.21131000 | 0.20062600  |
| H | -4.48495700 | -2.18831900 | -1.60686300 |
| H | -3.32929500 | -1.60006600 | -0.42547800 |
| H | -4.13486300 | 0.55352100  | -0.58974900 |
| H | -7.00735400 | -0.34839900 | -3.24885200 |
| H | -6.54011900 | -1.59016400 | -2.15776000 |

|    |             |             |             |
|----|-------------|-------------|-------------|
| H  | -4.87832300 | 2.08998500  | -1.73423800 |
| H  | -6.43367300 | 1.93930300  | -2.60521500 |
| H  | 2.40000600  | -0.55910700 | -4.01809200 |
| H  | -0.11215100 | -4.43174400 | 0.38177100  |
| H  | -1.57946800 | 0.63113200  | 3.97288600  |
| H  | 1.55496200  | 4.44644100  | -0.12231700 |
| H  | 1.53598800  | -5.71200800 | -2.80557600 |
| H  | 1.62276400  | -5.70741600 | -1.04461900 |
| H  | 0.05612300  | -5.62534900 | -1.85239700 |
| H  | 2.38065700  | -4.42304900 | -4.27388200 |
| H  | 3.41398200  | -2.99793700 | -4.17757400 |
| H  | -2.10705700 | -4.97169300 | 1.81904500  |
| H  | -0.65471300 | -5.12355400 | 2.80658100  |
| H  | -2.18763600 | -4.68868700 | 3.55867300  |
| H  | -1.86292100 | -1.67054000 | 5.32046800  |
| H  | -0.55578100 | 2.65814200  | 5.25934800  |
| H  | -0.90753200 | 4.30230400  | 4.73443500  |
| H  | -2.09226800 | 3.02443400  | 4.47233300  |
| H  | -0.01541600 | 5.64042800  | 3.38317700  |
| H  | 2.99920200  | 4.73868000  | -3.69629200 |
| H  | 3.29768000  | 4.95953900  | -1.97265400 |
| H  | 1.68228800  | 5.23026700  | -2.63018700 |
| H  | 2.17488500  | 1.64328700  | -5.42551500 |
| H  | 3.23540300  | 3.01276700  | -5.07989500 |
| Cl | -2.13709600 | 2.03837400  | -1.40753800 |
| O  | -1.26048800 | 0.22858600  | -0.82685500 |
| O  | -3.56305200 | 2.28089600  | -0.62890300 |
| H  | 7.31641200  | -2.65286500 | 2.72493400  |
| H  | 5.60308300  | -3.09061900 | 2.84898400  |
| H  | 1.86186900  | -2.90553000 | -5.00501700 |
| H  | -3.30497400 | -1.34835400 | 4.36407900  |
| H  | -2.80749000 | -3.01135400 | 4.67751200  |
| H  | 1.66019300  | 5.36553200  | 2.88973000  |
| H  | 0.46332700  | 5.88631100  | 1.70300100  |
| H  | 3.80650800  | 1.36626200  | -4.80248400 |
| H  | 4.63118700  | 0.33105200  | 3.32810100  |
| H  | -5.10470700 | -1.64020800 | 1.36747500  |

## Int1<sub>VI,41</sub>

|                                           |              |
|-------------------------------------------|--------------|
| Energy with the small basis set:          | -2626.223782 |
| Solution energy with the small basis set: | -2626.223798 |
| Energy with larger basis sets:            | -2626.905801 |
| Zero-point energy:                        | 0.772347     |
| Dispersion effect:                        | -0.177531321 |

|    |             |             |             |
|----|-------------|-------------|-------------|
| C  | 83.56100000 | 29.40899997 | 40.48999995 |
| C  | 84.44527521 | 28.40867202 | 39.72213042 |
| C  | 84.37948443 | 28.58062151 | 38.23660391 |
| N  | 84.87903941 | 29.69326405 | 37.57797144 |
| C  | 83.82907852 | 27.81327334 | 37.24250884 |
| C  | 84.62342100 | 29.56212446 | 36.25259554 |
| N  | 83.98506935 | 28.42989487 | 36.01621477 |
| C  | 78.74700005 | 28.42299994 | 29.79600007 |
| C  | 79.58517105 | 28.10932672 | 31.04228454 |
| N  | 79.68507187 | 26.67904211 | 31.35326765 |
| C  | 78.77709073 | 25.98494091 | 32.02661242 |
| N  | 77.56355996 | 26.51610422 | 32.30633238 |
| N  | 79.07116597 | 24.75474832 | 32.47600971 |
| Fe | 83.30200387 | 27.69317131 | 34.02670889 |
| C  | 83.69267307 | 24.42887543 | 35.06303499 |
| C  | 80.10628308 | 27.68682731 | 35.29358708 |
| C  | 82.85932206 | 30.89220325 | 32.91602614 |
| C  | 86.64157456 | 27.85152614 | 33.25733961 |
| N  | 82.13757154 | 26.32715598 | 35.09235703 |
| C  | 82.45902396 | 25.02310888 | 35.34530050 |
| C  | 81.31390945 | 24.34585393 | 35.95897407 |
| C  | 80.31518667 | 25.27702285 | 36.05383358 |
| C  | 80.84345253 | 26.51440784 | 35.47993895 |
| C  | 78.92957803 | 25.11791162 | 36.60156114 |
| C  | 81.28900000 | 22.90700012 | 36.36999994 |
| N  | 81.76728976 | 29.09495291 | 34.16423791 |
| C  | 80.51484945 | 28.85005087 | 34.63181742 |
| C  | 79.62505135 | 29.95276576 | 34.26106936 |
| C  | 80.37128570 | 30.83011455 | 33.51971160 |
| C  | 81.73838856 | 30.28561073 | 33.48879248 |
| C  | 78.17521151 | 30.03101942 | 34.63498032 |
| C  | 79.89800004 | 32.07999994 | 32.83400002 |
| N  | 84.57386418 | 29.16302576 | 33.27871422 |
| C  | 84.17864629 | 30.39905917 | 32.86742508 |
| C  | 85.34507040 | 31.14544393 | 32.39658673 |
| C  | 86.43947117 | 30.32866915 | 32.53721590 |



|   |             |             |             |
|---|-------------|-------------|-------------|
| C | 85.92657488 | 29.04370383 | 33.05906720 |
| C | 85.35217372 | 32.55478955 | 31.88456950 |
| C | 87.85999994 | 30.75899997 | 32.22300003 |
| N | 84.89829039 | 26.35537555 | 34.14639734 |
| C | 86.16160237 | 26.59860866 | 33.70535349 |
| C | 86.94735320 | 25.34809841 | 33.77359396 |
| C | 86.11299046 | 24.36956050 | 34.25585514 |
| C | 84.82031600 | 25.03395767 | 34.49449382 |
| C | 88.38439824 | 25.23621773 | 33.36331280 |
| C | 86.39099997 | 22.89700005 | 34.52599999 |
| H | 85.48551969 | 28.49541239 | 40.06427728 |
| H | 84.13383614 | 27.38519533 | 39.95476659 |
| H | 83.33088770 | 26.86183820 | 37.32993141 |
| H | 84.91395258 | 30.29008166 | 35.51283766 |
| H | 83.86441656 | 30.44481875 | 40.30169410 |
| H | 78.74633504 | 29.50233744 | 29.61577234 |
| H | 77.70220428 | 28.10408099 | 29.88971464 |
| H | 79.19535610 | 28.63500198 | 31.92037210 |
| H | 80.61173328 | 28.45638133 | 30.90859390 |
| H | 80.56901769 | 26.17558161 | 31.16979045 |
| H | 76.90026789 | 26.00412891 | 32.86450608 |
| H | 77.23545172 | 27.33349417 | 31.81980924 |
| H | 80.00878675 | 24.38385521 | 32.24835185 |
| H | 78.32532014 | 24.10629102 | 32.67522944 |
| H | 83.78765111 | 23.37744230 | 35.31243526 |
| H | 79.07928848 | 27.66909593 | 35.64333459 |
| H | 82.69957845 | 31.87113832 | 32.47629480 |
| H | 87.69451660 | 27.88275878 | 32.99554825 |
| H | 78.76684752 | 24.11507175 | 37.00356898 |
| H | 78.72717617 | 25.83220332 | 37.40856818 |
| H | 78.17212103 | 25.28874076 | 35.82592660 |
| H | 80.31707928 | 22.62142516 | 36.77942218 |
| H | 82.04335552 | 22.69041683 | 37.13635487 |
| H | 77.62563969 | 29.14073844 | 34.30520737 |
| H | 78.04500393 | 30.09928571 | 35.72193717 |
| H | 77.68854727 | 30.90411422 | 34.19416722 |
| H | 80.32896703 | 32.98131719 | 33.28692378 |
| H | 84.35081405 | 32.91512438 | 31.63699873 |
| H | 85.77593915 | 33.25006387 | 32.62075919 |
| H | 85.96391875 | 32.63902705 | 30.98015707 |
| H | 88.16212999 | 31.59468096 | 32.86447133 |
| H | 88.76716326 | 24.22459398 | 33.51724724 |
| H | 89.02183006 | 25.91978327 | 33.93746599 |
| H | 88.51949175 | 25.48263439 | 32.30308163 |

|    |             |             |             |
|----|-------------|-------------|-------------|
| H  | 85.73402362 | 22.25541474 | 33.92787608 |
| H  | 87.42378237 | 22.63924730 | 34.28166554 |
| Cl | 83.05598973 | 24.32252299 | 31.48597369 |
| O  | 82.80043691 | 27.19573257 | 32.56473675 |
| O  | 81.44825059 | 24.57432563 | 31.25795846 |
| H  | 83.63043719 | 29.23640943 | 41.56831855 |
| H  | 82.51258117 | 29.30952186 | 40.19364771 |
| H  | 81.49729016 | 22.24336920 | 35.52178604 |
| H  | 80.18229861 | 32.08808837 | 31.77522262 |
| H  | 78.81149638 | 32.17716326 | 32.88765840 |
| H  | 88.58132613 | 29.95104788 | 32.36999434 |
| H  | 87.94614046 | 31.09705501 | 31.18408314 |
| H  | 86.22417154 | 22.65028972 | 35.58078538 |
| H  | 85.36232244 | 30.46912857 | 38.00659613 |
| H  | 79.16017352 | 27.92942775 | 28.91167033 |
